# Supplementary material for: Dose-dependent and strain-dependent anti-obesity effects of Lactobacillus sakei in a diet induced obese murine model
Source: PeerJ. 2019 Mar 21;7:e6651. doi: 10.7717/peerj.6651 (PMC6431538; doi:10.7717/peerj.6651)
Supplement: Supplemental Information 1 — Raw data obtained during the animal experiments in four subsections, comprising information on weight, feed consumption, organ weight and blood chemistry. [file peerj-07-6651-s001.xls]

## Sheet: Weight
	Group		0 week				1st week				2nd week				3rd week				4th week				5th week				6th week				7th week			at sacrifice	Day 48-Day49
			Day 0 (12/15)	Day 4 (12/18)			Day 7 (12/22)	Day 10 (12/25)			Day 14 (12/29)	Day 17 (12/29)			Day 21 (1/5)	Day 24 (1/8)			Day 28 (1/12)	Day 31 (1/15)			Day 35 (1/19)	Day 38 (1/22)			Day 42 (1/26)	Day 45 (1/29)			Day 48 (2/1)			Day 49 (2/1)
		#	BW (g)	BW (g)	W.G (g)	W.G (%)	BW (g)	BW (g)	W.G(g)	W.G (%)	BW (g)	BW (g)	W.G (g)	W.G (%)	BW (g)	BW (g)	W.G (g)	W.G (%)	BW (g)	BW (g)	W.G (g)	W.G (%)	BW (g)	BW (g)	W.G (g)	W.G (%)	BW (g)	BW (g)	W.G (g)	W.G (%)	BW (g)	W.G (g)	W.G (%)	BW (g)	Weight gain
	G1 ND	1	22.62	22.54	-0.08	-0.353669	22.7	22.92	0.08	0.353669	22.8	22.85	0.18	0.795756	22.33	22.39	-0.29	-1.28205	22.4	22.21	-0.22	-0.972591	22.39	22.41	-0.23	-1.0168	23.05	22.4	0.43	1.90097	23.01	0.39	1.72414	20.02	2.99
		2	23.17	23.14	-0.03	-0.129478	22.98	23.84	-0.19	-0.820026	23.52	23.57	0.35	1.51057	23.95	23.88	0.78	3.36642	24.05	24.93	0.88	3.79801	24.75	24.53	1.58	6.81916	25.2	24.87	2.03	8.76133	25.64	2.47	10.6603	22.66	2.98
		3	23.6	23.03	-0.57	-2.41525	23.07	23.41	-0.53	-2.24576	23.21	23.56	-0.39	-1.65254	23.17	23.07	-0.43	-1.82203	23.53	23.52	-0.07	-0.29661	23.49	23.22	-0.11	-0.466102	23.34	23.17	-0.26	-1.10169	24.08	0.48	2.0339	21.55	2.53
		4	24.08	23.82	-0.26	-1.07973	23.78	24.12	-0.3	-1.24585	23.88	24.3	-0.2	-0.830565	23.83	23.98	-0.25	-1.03821	24.05	24.58	-0.03	-0.124585	24.27	23.93	0.19	0.789037	24.74	24.62	0.66	2.74086	25.15	1.07	4.44352	22.35	2.8
		5	24.16	23.17	-0.99	-4.09768	23.24	24.02	-0.92	-3.80795	23.53	24.18	-0.63	-2.60762	23.85	24.44	-0.31	-1.28311	24.47	24.13	0.31	1.28311	24.67	24.25	0.51	2.11093	24.04	24.17	-0.12	-0.496689	24.98	0.82	3.39404	22.02	2.96
		6	24.53	23.57	-0.96	-3.91358	23.73	24.17	-0.8	-3.26131	23.96	24.48	-0.57	-2.32369	24.06	24.31	-0.47	-1.91602	24.38	24.76	-0.15	-0.611496	25.19	25.29	0.66	2.69058	25.87	25.82	1.34	5.4627	26.36	1.83	7.46025	23.96	2.4
		7	24.66	24.26	-0.4	-1.62206	24.13	24.59	-0.53	-2.14923	25.01	25.28	0.35	1.4193	25.56	25.01	0.9	3.64964	25.38	26.77	0.72	2.91971	25.74	25.78	1.08	4.37956	26.25	25.8	1.59	6.44769	26.44	1.78	7.21817	24.08	2.36
		8	25.8	25.26	-0.54	-2.09302	25.21	25.6	-0.59	-2.28682	25.92	26.41	0.12	0.465116	26.17	26.04	0.37	1.43411	26	26.15	0.2	0.775194	26.22	26.31	0.42	1.62791	27.05	26.59	1.25	4.84496	27.27	1.47	5.69767	25.1	2.17
		9	26.06	25.85	-0.21	-0.805833	26.09	26.08	0.03	0.115119	25.9	26.84	-0.16	-0.613968	26.21	26.45	0.15	0.575595	26.36	27.04	0.3	1.15119	26.63	26.35	0.57	2.18726	27.29	27.05	1.23	4.71988	27.65	1.59	6.1013	25.34	2.31
		10	26.16	26.95	0.79	3.01988	26.71	27.02	0.55	2.10245	27.43	27.66	1.27	4.85474	28.16	27.38	2	7.64526	27.42	27.2	1.26	4.81651	27.54	27.75	1.38	5.27523	28.62	28.19	2.46	9.40367	28.61	2.45	9.36544	25.91	2.7
		Mean	24.484	24.159	-0.325	-1.34904	24.164	24.577	-0.32	-1.32457	24.516	24.913	0.032	0.101711	24.729	24.695	0.245	0.93296	24.804	25.129	0.32	1.27385	25.089	24.982	0.605	2.43968	25.545	25.268	1.061	4.26837	25.919	1.435	5.80988	23.299	2.62
		SD	1.21602	1.42383	0.512624	2.0502	1.38317	1.27408	0.448231	1.8033	1.48886	1.58555	0.561146	2.2263	1.7497	1.54703	0.790643	3.12952	1.48539	1.64184	0.489807	1.9697	1.52381	1.61916	0.596755	2.4719	1.81008	1.77826	0.88298	3.53948	1.69719	0.739162	2.97448	1.88647	0.306159
		SE	0.384541	0.450255	0.162106	0.64833	0.437397	0.402898	0.141743	0.570254	0.470818	0.501396	0.17745	0.704018	0.553304	0.489215	0.250023	0.989643	0.469721	0.519197	0.154891	0.622874	0.48187	0.512024	0.188711	0.781683	0.572397	0.562336	0.279223	1.11928	0.536699	0.233744	0.940615	0.596556	0.096816
	G2 HFD	11	27.84	28.37	0.53	1.90374	28.6	28.72	0.76	2.72989	29.75	29.74	1.91	6.86063	31.78	32.61	3.94	14.1523	35.21	34.5	7.37	26.4727	36.34	37.29	8.5	30.5316	39.22	38.56	11.38	40.8764	39.14	11.3	40.5891	36.67	2.47
		12	28.54	30.21	1.67	5.85144	32.13	32.65	3.59	12.5788	33.82	34.78	5.28	18.5004	35.44	36.09	6.9	24.1766	37.78	37.5	9.24	32.3756	38.24	39.39	9.7	33.9874	41.63	41.21	13.09	45.8655	41.72	13.18	46.1808	39.21	2.51
		13	28.55	26.94	-1.61	-5.63923	27.74	28.36	-0.81	-2.83713	30.12	31.46	1.57	5.49912	34.03	34.56	5.48	19.1944	35.51	35.3	6.96	24.3783	36.75	37.48	8.2	28.7215	39.72	39.78	11.17	39.1243	39.99	11.44	40.0701	37.71	2.28
		14	29.42	31.32	1.9	6.45819	30.96	31.48	1.54	5.23453	32.47	33.52	3.05	10.3671	33.68	33.49	4.26	14.4799	34.74	35.1	5.32	18.0829	35.81	36.48	6.39	21.7199	38.27	36.59	8.85	30.0816	38.22	8.8	29.9116	34	4.22
		15	29.43	28.04	-1.39	-4.72307	28.28	27.81	-1.15	-3.90758	30.54	30.55	1.11	3.77166	33.36	33.1	3.93	13.3537	34.17	34.15	4.74	16.106	36.47	37.38	7.04	23.9212	39.08	38.56	9.65	32.7897	38.97	9.54	32.4159	36.6	2.37
		16	30.32	29.97	-0.35	-1.15435	29.88	29.95	-0.44	-1.45119	31.57	32.22	1.25	4.12269	33.39	33.33	3.07	10.1253	33.87	33.58	3.55	11.7084	34.53	34.87	4.21	13.8852	36.06	35.64	5.74	18.9314	36.19	5.87	19.3602	34.29	1.9
		17	30.35	29.49	-0.86	-2.83361	29.86	30.01	-0.49	-1.6145	30.87	31.6	0.52	1.71334	32.82	32.82	2.47	8.13839	33.5	35.19	3.15	10.3789	36.83	37.37	6.48	21.3509	37.99	36.69	7.64	25.173	38.3	7.95	26.1944	35.13	3.17
		18	31.21	31.58	0.37	1.18552	32.55	32.16	1.34	4.2935	32.68	33.31	1.47	4.71003	34.22	34.11	3.01	9.64434	34.12	34.05	2.91	9.32393	35.29	35.53	4.08	13.0727	36.79	36.37	5.58	17.8789	36.82	5.61	17.975	35.39	1.43
		19	30.89	31.01	0.12	0.388475	31.9	32.06	1.01	3.26967	33.23	34.32	2.34	7.57527	35.16	35.01	4.27	13.8232	35.66	35.99	4.77	15.4419	37.25	37.9	6.36	20.5892	39.12	38.26	8.23	26.6429	39.59	8.7	28.1645	37.05	2.54
		20	32.38	32.45	0.07	0.216183	33.9	33.24	1.52	4.69426	34.14	35.21	1.76	5.43545	36.01	35.75	3.63	11.2106	36.01	35.74	3.63	11.2106	36.64	37.22	4.26	13.1563	38.05	39.02	5.67	17.5108	38.7	6.32	19.5182	37.5	1.2
		Mean	29.893	29.938	0.045	0.165328	30.58	30.644	0.687	2.29903	31.919	32.671	2.026	6.85557	33.989	34.087	4.096	13.8299	35.057	35.11	5.164	17.5479	36.415	37.091	6.522	22.0936	38.593	38.068	8.7	29.4874	38.764	8.871	30.038	36.355	2.409
		SD	1.39809	1.74452	1.16438	4.00516	2.04062	1.93216	1.43975	4.93757	1.57102	1.84539	1.33526	4.71795	1.27855	1.22675	1.29014	4.79678	1.26989	1.13941	2.08593	7.79071	1.03045	1.24952	1.93123	7.39005	1.55746	1.735	2.63527	10.1018	1.56443	2.55049	9.81331	1.63919	0.855524
		SE	0.442116	0.551666	0.36821	1.26654	0.645299	0.611001	0.45529	1.5614	0.4968	0.583563	0.422246	1.49195	0.404314	0.387932	0.407977	1.51687	0.401575	0.360312	0.65963	2.46364	0.325857	0.395133	0.61071	2.33694	0.492513	0.548657	0.833345	3.19446	0.494717	0.806536	3.10324	0.518357	0.27054
	G3 OLS (40)	21	27.95	25.35	-2.6	-9.30233	23.12	23.23	-4.83	-17.2809	24.27	25.01	-3.68	-13.1664	25.62	27.44	-2.33	-8.33631	27.12	27.6	-0.83	-2.96959	27.17	27.45	-0.78	-2.7907	29.12	30.26	1.17	4.18605	30.7	2.75	9.839	28.7	2
		22	28.49	27.11	-1.38	-4.8438	25.59	26.28	-2.9	-10.179	27.22	28.71	-1.27	-4.4577	29.95	30.35	1.46	5.12461	30.95	32.23	2.46	8.63461	31.67	32.51	3.18	11.1618	34.3	34.78	5.81	20.3931	34.22	5.73	20.1123	32.29	1.93
		23	28.58	26.02	-2.56	-8.95731	24.8	24.93	-3.78	-13.226	25.5	27.02	-3.08	-10.7768	28.25	29.03	-0.33	-1.15465	29.23	28.92	0.65	2.27432	28.59	29.6	0.01	0.0349895	31.73	32.86	3.15	11.0217	33.36	4.78	16.725	31.3	2.06
		24	29.33	26.59	-2.74	-9.34197	23.79	22.75	-5.54	-18.8885	23.41	25.04	-5.92	-20.1841	25.92	26.85	-3.41	-11.6263	26.93	27.45	-2.4	-8.18275	26.46	26.84	-2.87	-9.7852	28.22	29.5	-1.11	-3.78452	30.1	0.77	2.6253	27.93	2.17
		25	29.45	27.27	-2.18	-7.40238	25.69	24.89	-3.76	-12.7674	25.47	26.91	-3.98	-13.5144	26.76	29.15	-2.69	-9.13413	29.54	29.09	0.09	0.305603	28.94	30.03	-0.51	-1.73175	30.82	31.96	1.37	4.65195	32.51	3.06	10.3905	30.62	1.89
		26	30.27	27.54	-2.73	-9.01883	25.28	25.33	-4.99	-16.485	25.63	27.05	-4.64	-15.3287	29.05	29.44	-1.22	-4.03039	30.27	31.11	0	0	30.84	31.95	0.57	1.88305	34.24	34.67	3.97	13.1153	35.33	5.06	16.7162	33.23	2.1
		27	30.35	27.75	-2.6	-8.56672	25.33	25.72	-5.02	-16.5404	26.3	27.64	-4.05	-13.3443	27.45	27.68	-2.9	-9.55519	27.3	28.1	-3.05	-10.0494	27.52	28.41	-2.83	-9.32455	29.91	30.28	-0.44	-1.44975	30.75	0.4	1.31796	28.52	2.23
		28	30.74	27.38	-3.36	-10.9304	24.65	24.37	-6.09	-19.8113	24.58	25.59	-6.16	-20.039	26.79	26.73	-3.95	-12.8497	27.31	28.41	-3.43	-11.1581	27.31	28.97	-3.43	-11.1581	31.5	32.78	0.76	2.47235	33.75	3.01	9.7918	31.24	2.51
		29	31.32	28.64	-2.68	-8.55683	26.71	26.07	-4.61	-14.719	26.22	27.7	-5.1	-16.2835	28.39	28.89	-2.93	-9.35504	29.44	29.41	-1.88	-6.00255	27.15	27.79	-4.17	-13.3142	29.68	30.97	-1.64	-5.23627	31.82	0.5	1.59642	29.62	2.2
		30	32.3	29.62	-2.68	-8.29721	26.41	25.28	-5.89	-18.2353	24.81	26.24	-7.49	-23.1889	27.06	28.04	-5.24	-16.2229	28.89	28.24	-3.41	-10.5573	27.6	27.92	-4.7	-14.5511	29.96	30.98	-2.34	-7.24458	32.15	-0.15	-0.464396	29.97	2.18
		Mean	29.878	27.327	-2.551	-8.52178	25.137	24.885	-4.741	-15.8133	25.341	26.691	-4.537	-15.0284	27.524	28.36	-2.354	-7.71401	28.698	29.056	-1.18	-3.77052	28.325	29.147	-1.553	-4.95757	30.948	31.904	1.07	3.81253	32.469	2.591	8.86501	30.342	2.127
		SD	1.36939	1.22107	0.502139	1.57601	1.10035	1.15307	1.01207	3.04329	1.10982	1.21323	1.75349	5.35784	1.37568	1.1939	1.90508	6.18236	1.43832	1.53241	1.97869	6.55245	1.71138	1.8937	2.46481	8.09216	2.0399	1.83945	2.61204	8.85448	1.69664	2.13863	7.37729	1.71367	0.177517
		SE	0.433038	0.386138	0.15879	0.498379	0.347962	0.364631	0.320043	0.962374	0.350956	0.383656	0.554503	1.6943	0.435028	0.377545	0.602438	1.95503	0.454838	0.48459	0.625717	2.07207	0.541186	0.598842	0.77944	2.55896	0.645073	0.581684	0.826	2.80003	0.536525	0.676295	2.3329	0.54191	0.0561357
	G5 CJB38-1	41	27.91	27.82	-0.09	-0.322465	29.03	29.35	1.12	4.0129	30.39	31.78	2.48	8.8857	32.61	32.44	4.7	16.8398	33.55	34.09	5.64	20.2078	35.13	35.58	7.22	25.8689	37.06	36.5	9.15	32.7839	36.71	8.8	31.5299	35.2	1.51
		42	28.42	26.8	-1.62	-5.70021	27.36	27.38	-1.06	-3.72977	28.97	30.05	0.55	1.93526	30.72	31.07	2.3	8.09289	32.04	33.22	3.62	12.7375	33.99	34.53	5.57	19.5989	35.11	35.38	6.69	23.5398	35.85	7.43	26.1436	33.72	2.13
		43	28.62	28.73	0.11	0.384347	28.49	28.44	-0.13	-0.454228	29.43	30.29	0.81	2.83019	31.19	31.24	2.57	8.97973	31.93	33.09	3.31	11.5653	33.97	34.51	5.35	18.6932	36.27	35.7	7.65	26.7296	35.63	7.01	24.4934	33.89	1.74
		44	29.28	27.77	-1.51	-5.1571	28.08	28.01	-1.2	-4.09836	29.38	30	0.1	0.34153	30.07	29.89	0.79	2.69809	31.03	31.83	1.75	5.97678	32.65	33.45	3.37	11.5096	35.08	34.62	5.8	19.8087	35.65	6.37	21.7555	33.63	2.02
		45	29.51	28.02	-1.49	-5.04914	28.21	28.89	-1.3	-4.40529	29.26	30.01	-0.25	-0.84717	30.1	30.41	0.59	1.99932	30.98	31.9	1.47	4.98136	32.37	32.97	2.86	9.69163	33.84	33.74	4.33	14.673	34.61	5.1	17.2823	32.77	1.84
		46	30.15	30	-0.15	-0.497512	30.8	31.24	0.65	2.15589	31.31	32.37	1.16	3.84743	33.02	33.15	2.87	9.51907	33.88	34.36	3.73	12.3715	35.05	35.63	4.9	16.2521	36.34	35.96	6.19	20.5307	35.9	5.75	19.0713	34.03	1.87
		47	30.44	29.89	-0.55	-1.80683	30.71	30.82	0.27	0.886991	31.86	34.44	1.42	4.66491	35.42	35.42	4.98	16.3601	36.36	36.85	5.92	19.4481	37.35	37.95	6.91	22.7004	39.72	39.64	9.28	30.4862	40.03	9.59	31.5046	37.77	2.26
		48	31.12	30.66	-0.46	-1.47815	32.3	32.24	1.18	3.79177	34.05	32.4	2.93	9.41517	32.61	32.71	1.49	4.78792	33.5	33.79	2.38	7.64781	33.46	34.9	2.34	7.51928	35.69	36.27	4.57	14.6851	36.94	5.82	18.7018	34.32	2.62
		49	31.33	30.07	-1.26	-4.0217	31.2	31.5	-0.13	-0.414938	32.26	33.39	0.93	2.9684	34.23	34.17	2.9	9.2563	34.96	35.87	3.63	11.5863	36.54	37.23	5.21	16.6294	38.79	38.53	7.46	23.811	38.45	7.12	22.7258	36.32	2.13
		50	32.16	30.9	-1.26	-3.91791	31.03	31.5	-1.13	-3.51368	32.34	33.83	0.18	0.559701	34.51	34.81	2.35	7.30721	36.29	36.7	4.13	12.842	36.91	38.1	4.75	14.7699	39.25	39.42	7.09	22.046	39.43	7.27	22.6057	37.15	2.28
		Mean	29.894	29.066	-0.828	-2.75667	29.721	29.937	-0.173	-0.576871	30.925	31.856	1.031	3.46011	32.448	32.531	2.554	8.58404	33.452	34.17	3.558	11.9365	34.742	35.485	4.848	16.3233	36.715	36.576	6.821	22.9094	36.92	7.026	23.5814	34.88	2.04
		SD	1.38725	1.41569	0.66673	2.26232	1.67457	1.71919	0.966506	3.25622	1.70212	1.70161	1.02177	3.4344	1.89667	1.8834	1.44982	4.99324	1.97953	1.80609	1.46657	5.04463	1.75714	1.78453	1.60629	5.72814	1.96596	1.99555	1.67891	5.98344	1.79988	1.38144	4.9688	1.66858	0.316017
		SE	0.438685	0.447681	0.210839	0.715407	0.529546	0.543656	0.305636	1.02971	0.538259	0.538096	0.323111	1.08605	0.599781	0.595583	0.458474	1.579	0.625983	0.571135	0.463769	1.59525	0.555657	0.564317	0.507954	1.8114	0.621692	0.631049	0.530918	1.89213	0.569171	0.43685	1.57127	0.527651	0.0999333
	G6 CJB38-2	51	27.91	28.26	0.35	1.25403	29.3	29.24	1.39	4.98029	29.89	30.96	1.98	7.09423	31.37	31.1	3.46	12.397	32.19	32.94	4.28	15.335	33.11	33.47	5.2	18.6313	34.78	34.24	6.87	24.6148	34.28	6.37	22.8234	32.41	1.87
		52	28.4	28.16	-0.24	-0.84507	28.72	28.77	0.32	1.12676	29.22	29.66	0.82	2.88732	30.56	30.73	2.16	7.60563	31.28	31.51	2.88	10.1408	31.9	32.59	3.5	12.3239	33.38	33.8	4.98	17.5352	33.33	4.93	17.3592	31.62	1.71
		53	28.64	28.07	-0.57	-1.99022	28.83	28.59	0.19	0.663408	29.29	29.46	0.65	2.26955	29.38	29.52	0.74	2.5838	30.91	30.47	2.27	7.92598	29.45	28.74	0.81	2.82821	30.5	30.73	1.86	6.49441	31.03	2.39	8.34497	28.45	2.58
		54	29.14	27.97	-1.17	-4.0151	28.24	28.66	-0.9	-3.08854	29.24	29.83	0.1	0.343171	30.57	29.89	1.43	4.90734	30.27	30.9	1.13	3.87783	31.42	31.58	2.28	7.8243	33.19	33.1	4.05	13.8984	32.97	3.83	13.1434	31.11	1.86
		55	29.62	28.59	-1.03	-3.47738	29.24	29.48	-0.38	-1.28292	29.82	30.48	0.2	0.675219	31	32.19	1.38	4.65901	32.66	33.72	3.04	10.2633	35	35.85	5.38	18.1634	37.22	36.71	7.6	25.6583	35.94	6.32	21.3369	34.29	1.65
		56	30.08	29.4	-0.68	-2.26064	30.8	31.23	0.72	2.39362	32.3	33.29	2.22	7.38032	33.97	33.65	3.89	12.9322	34.34	35.01	4.26	14.1622	35.11	35.48	5.03	16.7221	37.13	37.18	7.05	23.4375	37.32	7.24	24.0691	35.5	1.82
		57	30.44	29.61	-0.83	-2.72668	30.27	30.44	-0.17	-0.558476	31.14	31.69	0.7	2.29961	32.29	32.23	1.85	6.07753	32.92	33.23	2.48	8.14717	33.28	33.68	2.84	9.32983	35.31	34.6	4.87	15.9987	35.32	4.88	16.0315	33.44	1.88
		58	31.12	30.09	-1.03	-3.30977	31.05	31.44	-0.07	-0.224936	32.61	34.33	1.49	4.78792	35.4	35.79	4.28	13.7532	36.17	37.16	5.05	16.2275	38.29	38.9	7.17	23.0398	41.85	40.86	10.73	34.4794	41.01	9.89	31.7802	39.59	1.42
		59	31.34	30.45	-0.89	-2.83982	30.37	31.39	-0.97	-3.09509	31.94	32.35	0.6	1.91449	33.06	33.18	1.72	5.48819	34.24	35.54	2.9	9.25335	36.35	36.7	5.01	15.986	39.07	39.15	7.73	24.665	39.06	7.72	24.6331	37.26	1.8
		60	32.14	31.59	-0.55	-1.71126	32.12	32.11	-0.02	-0.0622278	33.5	34.66	1.36	4.23149	35.27	35.05	3.13	9.73864	36.71	37.08	4.57	14.219	37.11	38.21	4.97	15.4636	40.55	40.49	8.41	26.1668	41.12	8.98	27.9403	39.54	1.58
		Mean	29.883	29.219	-0.664	-2.19219	29.894	30.135	0.011	0.0851899	30.895	31.671	1.012	3.38833	32.287	32.333	2.404	8.01425	33.169	33.756	3.286	10.9552	34.102	34.52	4.219	14.0312	36.298	36.086	6.415	21.2949	36.138	6.255	20.7462	34.321	1.817
		SD	1.38862	1.22012	0.45125	1.52376	1.22506	1.3386	0.708464	2.43358	1.60346	1.92449	0.720491	2.44571	2.07893	2.10256	1.20047	3.94409	2.17097	2.41141	1.22028	3.93144	2.76498	3.12389	1.84589	5.97732	3.54655	3.35998	2.51949	7.88475	3.44263	2.31512	7.068	3.67471	0.30627
		SE	0.43912	0.385837	0.142698	0.481857	0.387396	0.423302	0.224036	0.769565	0.507057	0.608577	0.227839	0.773402	0.657416	0.664889	0.379623	1.24723	0.686522	0.762556	0.385885	1.24323	0.874364	0.987862	0.583721	1.8902	1.12152	1.06252	0.796733	2.49338	1.08865	0.732104	2.2351	1.16205	0.096851
	G7 CJB38-3	61	27.92	27.45	-0.47	-1.68338	28.42	29.05	0.5	1.79083	29.74	30.35	1.82	6.51862	30.12	30.6	2.2	7.87966	31.03	31.33	3.11	11.139	32.21	32.56	4.29	15.3653	33.89	33.67	5.97	21.3825	34.09	6.17	22.0989	31.81	2.28
		62	28.36	26.98	-1.38	-4.86601	28.77	29.36	0.41	1.4457	30.96	32.13	2.6	9.16784	33.05	32.66	4.69	16.5374	33.68	34.6	5.32	18.7588	36.09	36.89	7.73	27.2567	38.59	38.01	10.23	36.0719	38.56	10.2	35.9661	35.63	2.93
		63	28.65	28.04	-0.61	-2.12914	29.82	30.47	1.17	4.08377	32.46	33.52	3.81	13.2984	33.14	33.45	4.49	15.6719	34.71	35.51	6.06	21.1518	36.94	37.63	8.29	28.9354	39.52	39.37	10.87	37.9407	39.58	10.93	38.1501	37.67	1.91
		64	29.04	27.75	-1.29	-4.44215	28.84	29.63	-0.2	-0.688705	30.52	31.12	1.48	5.09642	32.07	31.72	3.03	10.4339	32.08	33.16	3.04	10.4683	33.56	34.33	4.52	15.5647	35.52	35.09	6.48	22.314	35.48	6.44	22.1763	32.87	2.61
		65	29.64	27.29	-2.35	-7.92848	26.77	27.62	-2.87	-9.68286	27.78	28.18	-1.86	-6.2753	28.05	27.92	-1.59	-5.36437	28.75	29.12	-0.89	-3.0027	29.42	29.99	-0.22	-0.74224	31.07	30.08	1.43	4.82456	30.7	1.06	3.57625	28.16	2.54
		66	30.06	30.01	-0.05	-0.166334	31.55	32.94	1.49	4.95675	33	34.33	2.94	9.78044	35.47	36.02	5.41	17.9973	37.09	37.88	7.03	23.3866	38.99	39.71	8.93	29.7073	41.65	42.1	11.59	38.5562	41.35	11.29	37.5582	39.62	1.73
		67	30.45	29.6	-0.85	-2.79146	30.6	31.11	0.15	0.492611	31.22	31.74	0.77	2.52874	32.23	31.88	1.78	5.84565	32.81	33.3	2.36	7.75041	34.43	35.06	3.98	13.0706	36.66	36.58	6.21	20.3941	36.73	6.28	20.624	34.55	2.18
		68	31.01	30.92	-0.09	-0.290229	28.87	29.71	-2.14	-6.901	29.96	30.81	-1.05	-3.386	32.22	33.24	1.21	3.90197	32.49	32.85	1.48	4.77265	33.72	33.89	2.71	8.73912	35.78	35.94	4.77	15.3821	35.7	4.69	15.1242	33.65	2.05
		69	31.44	29.81	-1.63	-5.18448	31.38	31.8	-0.06	-0.19084	32.73	33.64	1.29	4.10305	35.17	34.34	3.73	11.8639	36.34	36.95	4.9	15.5852	38.28	39.47	6.84	21.7557	41.24	42.06	9.8	31.1705	41.3	9.86	31.3613	39.66	1.64
		70	32.09	31.09	-1	-3.11624	30.11	30.28	-1.98	-6.17015	30.31	30.3	-1.78	-5.5469	31.31	31.42	-0.78	-2.43066	32.42	33.67	0.33	1.02836	34.43	34.73	2.34	7.29199	36.61	35.64	4.52	14.0854	36.22	4.13	12.8701	33.13	3.09
		Mean	29.866	28.894	-0.972	-3.25979	29.513	30.197	-0.353	-1.08639	30.868	31.612	1.002	3.52853	32.283	32.325	2.417	8.23366	33.14	33.837	3.274	11.1038	34.807	35.426	4.941	16.6945	37.053	36.854	7.187	24.2122	36.971	7.105	23.9505	34.675	2.296
		SD	1.38957	1.55883	0.71695	2.4007	1.46835	1.49905	1.47437	4.88702	1.5897	1.86796	1.98242	6.71116	2.19621	2.20331	2.32638	7.89412	2.46073	2.57556	2.55693	8.70985	2.87789	3.04869	2.95175	10.1558	3.28691	3.709	3.30104	11.3817	3.32221	3.37533	11.6406	3.59861	0.490401
		SE	0.439419	0.492944	0.22672	0.759167	0.464332	0.474042	0.466238	1.54541	0.502708	0.5907	0.626897	2.12226	0.694504	0.696747	0.735665	2.49634	0.77815	0.814464	0.808571	2.7543	0.910067	0.96408	0.933427	3.21154	1.03941	1.17289	1.04388	3.5992	1.05058	1.06737	3.68107	1.13798	0.155078
	G8 CJB46-1	71	27.84	28.67	0.83	2.98132	29.72	30.51	1.88	6.75287	30.44	31.18	2.6	9.33908	31.05	31.21	3.21	11.5302	31.79	31.36	3.95	14.1882	32.3	31.56	4.46	16.0201	33.22	33.25	5.38	19.3247	32.18	4.34	15.5891	29.63	2.55
		72	28.34	28.19	-0.15	-0.529287	27.79	28.25	-0.55	-1.94072	29.09	28.97	0.75	2.64644	29.35	29.13	1.01	3.56387	28.57	29.02	0.23	0.811574	29.01	29.15	0.67	2.36415	29.69	29.6	1.35	4.76359	29.66	1.32	4.65773	26.77	2.89
		73	28.67	27.79	-0.88	-3.06941	28.26	28.3	-0.41	-1.43007	28.17	29.68	-0.5	-1.74398	30.06	29.92	1.39	4.84827	31.85	32.65	3.18	11.0917	32.91	33.29	4.24	14.789	35.03	34.11	6.36	22.1835	34.31	5.64	19.6721	32.62	1.69
		74	29.02	28.29	-0.73	-2.51551	31.04	31.29	2.02	6.96072	32.25	33.45	3.23	11.1303	34.75	34.5	5.73	19.745	36.63	36.05	7.61	26.2233	37.07	37.4	8.05	27.7395	38.81	38.41	9.79	33.7354	38.36	9.34	32.1847	35.92	2.44
		75	29.71	28.2	-1.51	-5.08246	28.63	28.47	-1.08	-3.63514	30.2	31.4	0.49	1.64928	31.89	32.13	2.18	7.3376	33.6	33.87	3.89	13.0932	33.77	34.52	4.06	13.6654	35.82	35.53	6.11	20.5655	36.41	6.7	22.5513	34.23	2.18
		76	30.05	31.37	1.32	4.39268	31.21	31.04	1.16	3.86023	30.78	31.05	0.73	2.42928	31.88	32.48	1.83	6.08985	33.33	33.71	3.28	10.9151	33.69	33.74	3.64	12.1131	35.03	34.78	4.98	16.5724	35.36	5.31	17.6705	33.42	1.94
		77	30.46	29.48	-0.98	-3.21733	29.04	28.52	-1.42	-4.66185	30.34	32.18	-0.12	-0.393959	31.86	31.06	1.4	4.59619	31.86	32.35	1.4	4.59619	32.69	33.76	2.23	7.32108	35.63	34.45	5.17	16.9731	34.28	3.82	12.541	33.19	1.09
		78	31.28	31.39	0.11	0.351662	31.99	31.77	0.71	2.26982	32.49	32.88	1.21	3.86829	33.29	33.76	2.01	6.42583	34.49	38.92	3.21	10.2621	38.63	38.72	7.35	23.4974	40.19	40.99	8.91	28.4847	36.26	4.98	15.9207	35.08	1.18
		79	31.45	30.67	-0.78	-2.48013	31.2	31.37	-0.25	-0.794913	34.61	35.09	3.16	10.0477	36.25	36.71	4.8	15.2623	37.75	35.08	6.3	20.0318	34.67	34.84	3.22	10.2385	36	36	4.55	14.4674	35.69	4.24	13.4817	34.32	1.37
		80	32.09	32.46	0.37	1.15301	33.17	33.39	1.08	3.36553	31.76	30.76	-0.33	-1.02836	31.2	32.35	-0.89	-2.77345	32.71	33.13	0.62	1.93207	33.33	34.54	1.24	3.86413	35.94	35.23	3.85	11.9975	40.89	8.8	27.4229	39.79	1.1
		Mean	29.891	29.651	-0.24	-0.801546	30.205	30.291	0.314	1.07465	31.013	31.664	1.122	3.7944	32.158	32.325	2.267	7.66257	33.258	33.614	3.367	11.3145	33.807	34.152	3.916	13.1612	35.536	35.235	5.645	18.9068	35.34	5.449	18.1692	33.497	1.843
		SD	1.43135	1.68177	0.893371	3.01063	1.77523	1.79953	1.21842	4.15365	1.84045	1.80629	1.40486	4.7484	2.09269	2.23399	1.90408	6.37566	2.6153	2.69275	2.3224	7.84913	2.62954	2.68701	2.36654	8.00834	2.84602	3.01211	2.40774	8.17822	3.09963	2.37121	7.82941	3.5003	0.656693
		SE	0.452633	0.531822	0.282509	0.952045	0.561378	0.569061	0.385297	1.3135	0.582	0.5712	0.444254	1.50157	0.661767	0.706448	0.602124	2.01616	0.827029	0.851523	0.734408	2.48211	0.831534	0.849708	0.748366	2.53246	0.89999	0.952513	0.761394	2.58618	0.98019	0.749842	2.47588	1.10689	0.207665
	G9 CJB46-2	81	27.95	27.82	-0.13	-0.465116	28.76	28.86	0.81	2.89803	29.66	30.87	1.71	6.11807	30.46	30.44	2.51	8.98032	30.61	30.92	2.66	9.51699	31.42	31.63	3.47	12.415	32.92	32.23	4.97	17.7818	32.33	4.38	15.6708	30.11	2.22
		82	28.29	29.23	0.94	3.32273	30.33	31.39	2.04	7.21103	31.83	32.54	3.54	12.5133	32.55	32.66	4.26	15.0583	33.81	34.41	5.52	19.5122	35.04	35.89	6.75	23.86	37.06	37.36	8.77	31.0004	36.99	8.7	30.7529	35.26	1.73
		83	28.71	27.56	-1.15	-4.00557	26.85	27.69	-1.86	-6.47858	28.95	29.46	0.24	0.835946	30.2	30.94	1.49	5.18983	31.49	31.83	2.78	9.68304	32.53	32.88	3.82	13.3055	34.16	33.74	5.45	18.9829	33.9	5.19	18.0773	31.55	2.35
		84	29.02	28.75	-0.27	-0.930393	28.5	29.56	-0.52	-1.79187	29.91	30.66	0.89	3.06685	30.4	31.12	1.38	4.75534	31.29	30.37	2.27	7.82219	31.47	32.16	2.45	8.44245	33.5	33.74	4.48	15.4376	33.51	4.49	15.4721	31.38	2.13
		85	29.77	29.43	-0.34	-1.14209	29.75	30.48	-0.02	-0.0671817	30.86	31.89	1.09	3.6614	33.46	33.64	3.69	12.395	34.33	35	4.56	15.3174	35.96	36.66	6.19	20.7927	38.14	37.96	8.37	28.1156	38.17	8.4	28.2163	36.06	2.11
		86	30.05	29.69	-0.36	-1.198	29.74	30.53	-0.31	-1.03161	30.81	31.63	0.76	2.52912	31.16	31.24	1.11	3.69384	32.19	33.18	2.14	7.12146	33.96	34.07	3.91	13.0116	34.93	34.76	4.88	16.2396	35.24	5.19	17.2712	33.21	2.03
		87	30.47	30.24	-0.23	-0.754841	30.64	30.64	0.17	0.557926	31.48	32.33	1.01	3.31474	32.17	32.3	1.7	5.57926	32.69	33.33	2.22	7.28585	33.56	34.24	3.09	10.1411	34.47	34.14	4	13.1277	34.78	4.31	14.1451	32.8	1.98
		88	30.87	30.22	-0.65	-2.1056	31.08	30.97	0.21	0.680272	31.36	32.06	0.49	1.5873	33.39	32.84	2.52	8.16327	33.33	33.4	2.46	7.9689	33.8	32.88	2.93	9.49142	33.77	33.27	2.9	9.39423	33.92	3.05	9.88014	32.02	1.9
		89	31.56	31.14	-0.42	-1.3308	31.93	32.44	0.37	1.17237	33.37	34.69	1.81	5.73511	35.07	34.76	3.51	11.1217	36.03	36.48	4.47	14.1635	37.1	37.08	5.54	17.5539	37.42	36.89	5.86	18.5678	37.8	6.24	19.7719	36.1	1.7
		90	32.08	32.15	0.07	0.218204	32.16	33.22	0.08	0.249377	33.74	34.35	1.66	5.17456	34.75	34.33	2.67	8.32294	35.19	35.33	3.11	9.69451	36.09	36.52	4.01	12.5	37.41	37.41	5.33	16.6147	37.99	5.91	18.4227	35.76	2.23
		Mean	29.877	29.623	-0.254	-0.839148	29.974	30.578	0.097	0.339976	31.197	32.048	1.32	4.45364	32.361	32.427	2.484	8.32598	33.096	33.425	3.219	10.8086	34.093	34.401	4.216	14.1514	35.378	35.15	5.501	18.5262	35.463	5.586	18.768	33.425	2.038
		SD	1.39016	1.40985	0.532566	1.84653	1.62989	1.61948	0.986937	3.45935	1.52851	1.59209	0.939208	3.31235	1.79371	1.49269	1.07534	3.67784	1.76658	1.96171	1.19322	4.14328	1.9513	2.01247	1.45146	5.0342	1.92699	2.05817	1.81984	6.49173	2.12071	1.80053	6.30321	2.21149	0.214103
		SE	0.439609	0.445835	0.168412	0.583923	0.515416	0.512124	0.312097	1.09394	0.483359	0.503463	0.297004	1.04746	0.56722	0.472031	0.340053	1.16303	0.558642	0.620346	0.377328	1.31022	0.617056	0.636399	0.458992	1.59195	0.609367	0.650851	0.575485	2.05287	0.670628	0.569376	1.99325	0.699333	0.0677052
	G10 CJB46-3	91	28.01	28.01	0	0	28.4	29.12	0.39	1.39236	30.44	32.12	2.43	8.67547	32.54	32.27	4.53	16.1728	32.11	32.79	4.1	14.6376	33.58	30.54	5.57	19.8858	31.33	33.33	3.32	11.8529	32.63	9.19	32.8097	30.48	2.15
		92	28.25	28.62	0.37	1.30973	29.01	29.04	0.76	2.69027	31.22	32.12	2.97	10.5133	32.96	32.8	4.71	16.6726	33.53	34.09	5.28	18.6903	34.74	35.21	6.49	22.9735	35.91	35.92	7.66	27.115	35.81	8.86	31.3628	34.38	1.43
		93	28.74	28.38	-0.36	-1.25261	29.27	30.06	0.53	1.84412	31.81	32.81	3.07	10.682	31.78	29.11	3.04	10.5776	28.59	28.81	-0.15	-0.521921	28.04	28.16	-0.7	-2.43563	28.87	29.04	0.13	0.452331	29.47	8.36	29.0884	27.16	2.31
		94	28.94	27.62	-1.32	-4.56116	29.25	30.57	0.31	1.07118	30.48	31.91	1.54	5.32135	33.01	33.14	4.07	14.0636	33.72	34.49	4.78	16.5169	35.1	35.32	6.16	21.2854	36.11	36.56	7.17	24.7754	37.15	10.17	35.1417	35.77	1.38
		95	29.77	30.09	0.32	1.07491	28.5	29.1	-1.27	-4.26604	30.9	33.2	1.13	3.79577	31.07	31.16	1.3	4.36681	32.61	33.91	2.84	9.53981	35.1	36.2	5.33	17.9039	37.85	37.79	8.08	27.1414	38.42	6.66	22.3715	36.16	2.26
		96	30	29.19	-0.81	-2.7	30.25	30.74	0.25	0.833333	31.42	32.36	1.42	4.73333	33.51	33.45	3.51	11.7	34.43	34.81	4.43	14.7667	35.69	36.18	5.69	18.9667	37.65	36.95	7.65	25.5	37.2	2.63	8.76667	34.68	2.52
		97	30.57	30.13	-0.44	-1.43932	30.56	31.44	-0.01	-0.0327118	31.88	32.92	1.31	4.28525	33.62	33.72	3.05	9.9771	34.56	35.35	3.99	13.052	35.3	36.13	4.73	15.4727	37.25	37.6	6.68	21.8515	37.11	5.24	17.141	35.03	2.08
		98	30.83	30.22	-0.61	-1.97859	31.68	31.07	0.85	2.75705	30.76	32.56	-0.07	-0.227052	33.25	33.3	2.42	7.8495	33.98	34.1	3.15	10.2173	34.92	34.91	4.09	13.2663	36.49	36.53	5.66	18.3587	37.1	-1.36	-4.41129	34.01	3.09
		99	31.66	31.22	-0.44	-1.38977	31.06	31.62	-0.6	-1.89514	32.45	33.98	0.79	2.49526	34.57	34.7	2.91	9.19141	35.76	36.6	4.1	12.9501	37.44	38.04	5.78	18.2565	39.34	39.45	7.68	24.2577	39.11	5.49	17.3405	36.58	2.53
		100	32.04	30.97	-1.07	-3.33958	31.65	31.98	-0.39	-1.21723	31.97	33.27	-0.07	-0.218477	34.5	34.38	2.46	7.6779	35.66	36.01	3.62	11.2984	34.92	35.11	2.88	8.98876	36.05	36	4.01	12.5156	36.43	6.38	19.9126	34.18	2.25
		Mean	29.881	29.445	-0.436	-1.42764	29.963	30.474	0.082	0.31772	31.333	32.725	1.452	5.00562	33.081	32.803	3.2	10.8249	33.495	34.096	3.614	12.1147	34.483	34.58	4.602	15.4564	35.685	35.917	5.804	19.3821	36.043	6.162	20.9524	33.843	2.2
		SD	1.39746	1.2575	0.554841	1.86259	1.24349	1.10044	0.66245	2.21821	0.686489	0.641149	1.10968	3.93211	1.09458	1.64409	1.04351	3.91524	2.07829	2.15646	1.50543	5.25117	2.45866	2.95204	2.14438	7.47594	3.17594	2.88042	2.57745	8.68979	3.63011	3.46404	12.1974	3.86647	0.505942
		SE	0.441916	0.397658	0.175456	0.589003	0.393226	0.347989	0.209485	0.701459	0.217087	0.202749	0.350912	1.24344	0.346136	0.519908	0.329987	1.23811	0.657212	0.681934	0.476058	1.66057	0.777497	0.933517	0.678113	2.3641	1.00432	0.91087	0.81506	2.74795	1.14794	1.09542	3.85714	1.22269	0.159993
	G11 CJJ03-1	101	28.12	26.16	-1.96	-6.97013	26.11	27.18	-2.01	-7.14794	28.93	30.85	0.81	2.88051	31.72	32.08	3.6	12.8023	33.2	33.18	5.08	18.0654	33.71	34.04	5.59	19.8791	35.55	34.95	7.43	26.4225	35.11	6.99	24.8578	33.56	1.55
		102	28.46	26.59	-1.87	-6.57063	26.8	27.58	-1.66	-5.83275	29.41	30.43	0.95	3.33802	31.36	31.1	2.9	10.1897	32.71	33.27	4.25	14.9332	33.38	34.01	4.92	17.2874	34.58	34.15	6.12	21.5039	33.83	5.37	18.8686	32.09	1.74
		103	28.81	28.14	-0.67	-2.32558	28.25	28.14	-0.56	-1.94377	29.07	30.21	0.26	0.902464	30.83	30.06	2.02	7.01145	30.6	31.36	1.79	6.21312	32.04	32.81	3.23	11.2114	33.77	33.36	4.96	17.2162	33.67	4.86	16.8691	30.7	2.97
		104	28.81	26.9	-1.91	-6.62964	26.54	27.6	-2.27	-7.87921	30.24	31.58	1.43	4.96355	32.84	33.05	4.03	13.9882	34.25	34.87	5.44	18.8823	35.85	36.54	7.04	24.436	37.54	37.37	8.73	30.302	37.89	9.08	31.5168	36.07	1.82
		105	29.81	28.17	-1.64	-5.50151	27.89	29.02	-1.92	-6.44079	30.36	31.02	0.55	1.84502	31.22	32.35	1.41	4.72996	32.68	33.19	2.87	9.62764	34.45	35.17	4.64	15.5652	35.84	36.15	6.03	20.2281	36.29	6.48	21.7377	34.7	1.59
		106	29.83	29.39	-0.44	-1.47503	30.57	30.89	0.74	2.48072	31.56	32.8	1.73	5.79953	32.51	32.37	2.68	8.98424	32.26	33.54	2.43	8.14616	34.02	34.91	4.19	14.0463	36.54	36.72	6.71	22.4941	36.53	6.7	22.4606	34.89	1.64
		107	30.69	31.48	0.79	2.57413	32.1	32.73	1.41	4.59433	34.22	35.56	3.53	11.5021	36.06	35.96	5.37	17.4976	36.37	37.93	5.68	18.5077	38.05	38.83	7.36	23.9818	40.52	40.51	9.83	32.03	40.26	9.57	31.1828	39.41	0.85
		108	30.7	30.41	-0.29	-0.944625	30.84	32.02	0.14	0.456026	33.17	33.32	2.47	8.0456	33.56	32.89	2.86	9.31596	32.99	33.78	2.29	7.45928	33.79	34.44	3.09	10.0651	35.7	35.72	5	16.2866	36.01	5.31	17.2964	34.44	1.57
		109	31.84	28.94	-2.9	-9.10804	30.06	30.76	-1.78	-5.59045	31.84	33.19	0	0	34.14	34.18	2.3	7.22362	34.35	35.13	2.51	7.88317	36.1	36.52	4.26	13.3794	38.22	38.06	6.38	20.0377	38.2	6.36	19.9749	36.51	1.69
		110	31.86	30.83	-1.03	-3.23289	30.86	31.34	-1	-3.13873	32.78	32.83	0.92	2.88763	33.38	32.97	1.52	4.77087	32.44	33.57	0.58	1.82046	34.19	35.6	2.33	7.31325	36.4	36.75	4.54	14.2498	36.78	4.92	15.4426	35.54	1.24
		Mean	29.893	28.701	-1.192	-4.01839	29.002	29.726	-0.891	-3.04426	31.158	32.179	1.265	4.21645	32.762	32.701	2.869	9.65139	33.185	33.982	3.292	11.1539	34.558	35.287	4.665	15.7165	36.466	36.374	6.573	22.0771	36.457	6.564	22.0207	34.791	1.666
		SD	1.35401	1.83972	1.06922	3.54354	2.13651	2.05309	1.27947	4.32509	1.84211	1.66563	1.07354	3.4883	1.59951	1.60537	1.20955	4.11027	1.5365	1.72406	1.71849	5.99173	1.69032	1.69757	1.64001	5.72772	1.92405	2.04772	1.69182	5.88873	2.01038	1.64044	5.66366	2.40775	0.53817
		SE	0.428175	0.581772	0.338118	1.12057	0.675623	0.649244	0.404605	1.36771	0.582527	0.526718	0.339484	1.1031	0.505808	0.507662	0.382493	1.29978	0.485884	0.545195	0.543433	1.89475	0.534525	0.536818	0.518616	1.81127	0.608439	0.647544	0.535002	1.86218	0.635738	0.518753	1.79101	0.761397	0.170184
	G12 CJJ03-2	111	27.88	25.25	-2.63	-9.43329	25.57	25.61	-2.31	-8.28551	25.68	26.56	-2.2	-7.89096	26.91	26.99	-0.97	-3.4792	27.57	28.18	-0.31	-1.11191	28.67	29.22	0.79	2.83357	30.08	29.55	2.2	7.89096	30.15	2.27	8.14204	26.78	3.37
		112	28.21	28.06	-0.15	-0.531726	28.75	29.4	0.54	1.91421	29.44	29.88	1.23	4.36016	30.63	30.83	2.42	8.57852	30.73	31.24	2.52	8.933	31.93	30.59	3.72	13.1868	31.71	31.84	3.5	12.4069	31.78	3.57	12.6551	29.09	2.69
		113	28.77	28.28	-0.49	-1.70316	28.92	28.38	0.15	0.521376	28.75	29.37	-0.02	-0.0695169	29.71	29.87	0.94	3.26729	30.03	30.74	1.26	4.37956	31.32	31.65	2.55	8.8634	31.91	31.86	3.14	10.9141	31.79	3.02	10.497	29.82	1.97
		114	28.87	28.3	-0.57	-1.97437	28.3	29.05	-0.57	-1.97437	29.74	30.02	0.87	3.01351	30.16	30.28	1.29	4.46831	30.9	31.97	2.03	7.03152	32.71	32.65	3.84	13.301	32.59	32.45	3.72	12.8853	32.94	4.07	14.0977	30.24	2.7
		115	29.8	29.78	-0.02	-0.0671141	31.45	32.22	1.65	5.53691	33.14	34.35	3.34	11.2081	34.87	34.75	5.07	17.0134	35.13	36.11	5.33	17.8859	37.03	37.18	7.23	24.2617	37.93	37.99	8.13	27.2819	37.68	7.88	26.443	35.71	1.97
		116	29.86	29.44	-0.42	-1.40656	29.74	30.07	-0.12	-0.401875	30.75	31.71	0.89	2.98058	31.26	31.21	1.4	4.68855	31.29	31.81	1.43	4.78902	31.85	32.09	1.99	6.66443	33.28	33.5	3.42	11.4534	33.59	3.73	12.4916	31.54	2.05
		117	30.64	29.87	-0.77	-2.51305	28.92	30.21	-1.72	-5.61358	28.68	30.08	-1.96	-6.39687	30.53	30.94	-0.11	-0.359008	31.77	32.41	1.13	3.68799	32.59	33.04	1.95	6.36423	34.88	34.75	4.24	13.8381	34.8	4.16	13.577	32.18	2.62
		118	31.17	29.74	-1.43	-4.58774	30.27	31.01	-0.9	-2.88739	32.18	33.28	1.01	3.2403	34.47	34.13	3.3	10.5871	35.69	35.67	4.52	14.5011	37.28	37.77	6.11	19.6022	39.1	38.66	7.93	25.4411	39.04	7.87	25.2486	36.61	2.43
		119	31.77	30.89	-0.88	-2.76991	28.13	28.68	-3.64	-11.4573	28.98	29.43	-2.79	-8.78187	30.23	30.44	-1.54	-4.84734	30.73	31.28	-1.04	-3.27353	32.11	32.6	0.34	1.07019	34.12	32.99	2.35	7.39692	34.01	2.24	7.05068	31.2	2.81
		120	31.87	30.64	-1.23	-3.85943	31.44	31.34	-0.43	-1.34923	32.73	33.48	0.86	2.69846	33.93	33.33	2.06	6.46376	34.04	34.87	2.17	6.80891	36	36.84	4.13	12.9589	38.6	38.46	6.73	21.117	38.48	6.61	20.7405	36.55	1.93
		Mean	29.884	29.025	-0.859	-2.88464	29.149	29.597	-0.735	-2.39968	30.007	30.816	0.123	0.436184	31.27	31.277	1.386	4.63814	31.788	32.428	1.904	6.36316	33.149	33.363	3.265	10.9106	34.42	34.205	4.536	15.0626	34.426	4.542	15.0943	31.972	2.454
		SD	1.44613	1.64372	0.762123	2.68267	1.73146	1.85803	1.5097	4.97392	2.26117	2.37191	1.8942	6.3139	2.47184	2.28002	1.98094	6.58403	2.48604	2.45509	1.93949	6.39932	2.75722	2.91899	2.20223	7.25603	3.14686	3.16912	2.22377	7.05064	3.0508	2.14074	6.78208	3.33602	0.473338
		SE	0.457307	0.519791	0.241005	0.848336	0.547537	0.58756	0.477408	1.57289	0.715043	0.750063	0.598999	1.99663	0.781663	0.721007	0.626429	2.08205	0.786156	0.776367	0.613319	2.02364	0.871909	0.923065	0.696407	2.29456	0.995126	1.00216	0.703217	2.22961	0.964748	0.676962	2.14468	1.05494	0.149683
	G13 CJJ03-3	121	28.06	26.48	-1.58	-5.63079	25.88	26.98	-2.18	-7.76907	27.99	27.52	-0.07	-0.249465	27.11	27.56	-0.95	-3.3856	27.82	27.96	-0.24	-0.85531	27.43	27.5	-0.63	-2.24519	28.74	28.23	0.68	2.42338	28.43	0.37	1.3186	25.39	3.04
		122	28.24	26.28	-1.96	-6.94051	26.23	26.83	-2.01	-7.11756	26.48	27.87	-1.76	-6.23229	26.94	27.73	-1.3	-4.6034	27.54	28.1	-0.7	-2.47875	27.77	28.88	-0.47	-1.66431	29.79	29.89	1.55	5.48867	30.55	2.31	8.17989	27.72	2.83
		123	28.75	27.92	-0.83	-2.88696	26.64	27.15	-2.11	-7.33913	27.85	28.27	-0.9	-3.13043	28.72	28.29	-0.03	-0.104348	27.99	28.26	-0.76	-2.64348	28.02	27.79	-0.73	-2.53913	28.5	28.68	-0.25	-0.869565	28.76	0.01	0.0347826	27.1	1.66
		124	28.89	28.61	-0.28	-0.969193	27.89	28.31	-1	-3.46141	29.56	30.39	0.67	2.31914	30.98	31.58	2.09	7.23434	31.9	32.14	3.01	10.4188	32.19	29.39	3.3	11.4226	31.74	32.26	2.85	9.86501	32.83	3.94	13.6379	30.92	1.91
		125	29.8	27.5	-2.3	-7.71812	28.22	28.42	-1.58	-5.30201	28.37	28.61	-1.43	-4.79866	29.29	28.82	-0.51	-1.71141	29.42	30.32	-0.38	-1.27517	31.04	31.25	1.24	4.16107	32.19	31.62	2.39	8.02013	31.69	1.89	6.34228	29.4	2.29
		126	29.95	29.51	-0.44	-1.46912	29.52	29.91	-0.43	-1.43573	30.35	30.75	0.4	1.33556	31.24	31.84	1.29	4.30718	32.6	32.85	2.65	8.84808	32.96	34.16	3.01	10.0501	34.71	35	4.76	15.8932	35.43	5.48	18.2972	33.96	1.47
		127	30.58	29.41	-1.17	-3.82603	29.45	30.04	-1.13	-3.69523	30.3	31.1	-0.28	-0.915631	31.52	32.1	0.94	3.0739	33.05	33.52	2.47	8.07717	33.45	33.56	2.87	9.38522	33.68	34.91	3.1	10.1373	35.31	4.73	15.4676	33.84	1.47
		128	30.74	30.53	-0.21	-0.683149	30.27	29.56	-0.47	-1.52895	29.57	31.56	-1.17	-3.80612	32.19	32.4	1.45	4.71698	33.26	34.35	2.52	8.19779	36.01	36.29	5.27	17.1438	37.5	37.26	6.76	21.9909	34.99	4.25	13.8256	33.16	1.83
		129	31.69	30.14	-1.55	-4.89113	29.65	29.32	-2.04	-6.43736	30.04	31.62	-1.65	-5.20669	31.15	31.49	-0.54	-1.70401	32.6	33.03	0.91	2.87157	32.99	33.29	1.3	4.10224	34.76	35.49	3.07	9.6876	36.13	4.44	14.0107	34.39	1.74
		130	32	30.56	-1.44	-4.5	29.8	29.72	-2.2	-6.875	30.32	30.79	-1.68	-5.25	31.3	31.46	-0.7	-2.1875	32.65	32.77	0.65	2.03125	32.93	32.28	0.93	2.90625	33.76	33.64	1.76	5.5	33.36	1.36	4.25	32.08	1.28
		Mean	29.87	28.694	-1.176	-3.9515	28.355	28.624	-1.515	-5.09614	29.083	29.848	-0.787	-2.59346	30.044	30.327	0.174	0.563613	30.883	31.33	1.013	3.3192	31.479	31.439	1.609	5.27227	32.537	32.698	2.667	8.81366	32.748	2.878	9.53646	30.796	1.952
		SD	1.38522	1.59455	0.718659	2.44978	1.62636	1.26731	0.704986	2.40429	1.33317	1.59819	0.904606	3.01163	1.899	1.96518	1.17145	3.98179	2.39133	2.45134	1.51996	5.13134	2.86377	2.96614	1.98086	6.60262	2.9081	3.07377	2.00335	6.53747	2.81074	1.93704	6.36808	3.22735	0.589911
		SE	0.438044	0.50424	0.22726	0.774689	0.5143	0.400758	0.222936	0.760305	0.421584	0.505393	0.286062	0.952362	0.600517	0.621445	0.370445	1.25915	0.756206	0.77518	0.480652	1.62267	0.905604	0.937975	0.626403	2.08793	0.919622	0.972013	0.633516	2.06733	0.888835	0.612544	2.01376	1.02058	0.186546

## Sheet: Feed consumption
	2. Feed consumption
	Group	A No.	0 day (11/11)			0 week	7 day (11/18)			1 week	14 day (11/25)			2 week	21 day (12/2)			3 week	28 day (12/9)			4 week	35 day (12/16)			5 week	42 day (12/23)			6 week
			Given	Left	daily consumption	weekly consumption	Given	Left	daily consumption	weekly consumption	Given	Left	daily consumption	weekly consumption	Given	Left	daily consumption	weekly consumption	Given	Left	daily consumption	weekly consumption	Given	Left	daily consumption	weekly consumption	Given	Left	daily consumption	weekly consumption
	ND	1	142.11	124.56	3.51	24.57	97.18	80.91	3.254	22.778	87.09	68.84	3.65	25.55	102.76	88.45	2.862	20.034	76.13	62.22	2.782	19.474	132.34	119.9	2.488	17.416	72.94	59.82	2.624	18.368
72.94		2			3.51	24.57			3.254	22.778			3.65	25.55			2.862	20.034			2.782	19.474			2.488	17.416			2.624	18.368
		3			3.51	24.57			3.254	22.778			3.65	25.55			2.862	20.034			2.782	19.474			2.488	17.416			2.624	18.368
		4			3.51	24.57			3.254	22.778			3.65	25.55			2.862	20.034			2.782	19.474			2.488	17.416			2.624	18.368
		5			3.51	24.57			3.254	22.778			3.65	25.55			2.862	20.034			2.782	19.474			2.488	17.416			2.624	18.368
		6	127.4	109.64	3.552	24.864	110.01	93.16	3.37	23.59	94.6	78.69	3.182	22.274	139.87	123.81	3.212	22.484	81.48	62.6	3.776	26.432	98.07	82.48	3.118	21.826	137.68	123.15	2.906	20.342
		7			3.552	24.864			3.37	23.59			3.182	22.274			3.212	22.484			3.776	26.432			3.118	21.826			2.906	20.342
		8			3.552	24.864			3.37	23.59			3.182	22.274			3.212	22.484			3.776	26.432			3.118	21.826			2.906	20.342
		9			3.552	24.864			3.37	23.59			3.182	22.274			3.212	22.484			3.776	26.432			3.118	21.826			2.906	20.342
		10			3.552	24.864			3.37	23.59			3.182	22.274			3.212	22.484			3.776	26.432			3.118	21.826			2.906	20.342
		Mean			3.531	24.717			3.312	23.184			3.416	23.912			3.037	21.259			3.279	22.953			2.803	19.621			2.765	19.355
		SD			0.0221359	0.154952			0.0611374	0.427962			0.246658	1.7266			0.184466	1.29126			0.523884	3.66719			0.332039	2.32427			0.148627	1.04039
		SE			0.00989949	0.0692965			0.0273415	0.19139			0.110309	0.772161			0.0824958	0.577471			0.234288	1.64002			0.148492	1.03945			0.066468	0.465276
	HFD	11	91.2	83.88	1.464	10.248	61.66	48.38	3.32	23.24	76.91	65.73	2.795	19.565	61.38	50.24	2.785	19.495	76.95	67.6	2.3375	16.3625	41.3	29.72	2.895	20.265	62.17	51.79	2.595	18.165
		12			1.464	10.248			3.32	23.24			2.795	19.565			2.785	19.495			2.3375	16.3625			2.895	20.265			2.595	18.165
		13			1.464	10.248			3.32	23.24			2.795	19.565			2.785	19.495			2.3375	16.3625			2.895	20.265			2.595	18.165
		15			1.464	10.248			3.32	23.24			2.795	19.565			2.785	19.495			2.3375	16.3625			2.895	20.265			2.595	18.165
		14			1.464	10.248	56.18	52.29	3.89	27.23	45.63	40.85	4.78	33.46	66.31	62.13	4.18	29.26	81.66	77.6	4.06	28.42	40.41	39.51	0.9	6.3	70.62	67.2	3.42	23.94
		16	110.14	98.08	2.412	16.884	70.63	58.71	2.384	16.688	81.89	67.96	2.786	19.502	61.57	50.56	2.202	15.414	80.7	70.22	2.096	14.672	40.88	28.1	2.556	17.892	69.85	58.31	2.308	16.156
		17			2.412	16.884			2.384	16.688			2.786	19.502			2.202	15.414			2.096	14.672			2.556	17.892			2.308	16.156
		18			2.412	16.884			2.384	16.688			2.786	19.502			2.202	15.414			2.096	14.672			2.556	17.892			2.308	16.156
		19			2.412	16.884			2.384	16.688			2.786	19.502			2.202	15.414			2.096	14.672			2.556	17.892			2.308	16.156
		20			2.412	16.884			2.384	16.688			2.786	19.502			2.202	15.414			2.096	14.672			2.556	17.892			2.308	16.156
		Mean			1.938	13.566			2.909	20.363			2.989	20.923			2.633	18.431			2.389	16.723			2.526	17.682			2.534	17.738
		SD			0.49964	3.49748			0.578904	4.05233			0.629309	4.40516			0.615939	4.31157			0.599268	4.19487			0.595634	4.16944			0.342419	2.39694
		SE			0.223446	1.56412			0.258894	1.81226			0.281436	1.97005			0.275456	1.92819			0.268001	1.876			0.266376	1.86463			0.153135	1.07194
	G3 OLS (40)	21	80.49	67.52	2.594	18.158	61.95	38	4.79	33.53	72.27	47.95	4.864	34.048	64.48	39.35	5.026	35.182	75.68	57.2	3.696	25.872	44.04	22.51	4.306	30.142	68.45	49.68	3.754	26.278
		22			2.594	18.158			4.79	33.53			4.864	34.048			5.026	35.182			3.696	25.872			4.306	30.142			3.754	26.278
		23			2.594	18.158			4.79	33.53			4.864	34.048			5.026	35.182			3.696	25.872			4.306	30.142			3.754	26.278
		24			2.594	18.158			4.79	33.53			4.864	34.048			5.026	35.182			3.696	25.872			4.306	30.142			3.754	26.278
		25			2.594	18.158			4.79	33.53			4.864	34.048			5.026	35.182			3.696	25.872			4.306	30.142			3.754	26.278
		26	63.08	52.89	2.038	14.266	74.38	51.09	4.658	32.606	66.64	41.92	4.944	34.608	69.48	49.59	3.978	27.846	76.13	55.62	4.102	28.714	46.71	26.58	4.026	28.182	92.88	73.83	3.81	26.67
		27			2.038	14.266			4.658	32.606			4.944	34.608			3.978	27.846			4.102	28.714			4.026	28.182			3.81	26.67
		28			2.038	14.266			4.658	32.606			4.944	34.608			3.978	27.846			4.102	28.714			4.026	28.182			3.81	26.67
		29			2.038	14.266			4.658	32.606			4.944	34.608			3.978	27.846			4.102	28.714			4.026	28.182			3.81	26.67
		30			2.038	14.266			4.658	32.606			4.944	34.608			3.978	27.846			4.102	28.714			4.026	28.182			3.81	26.67
		Mean			2.316	16.212			4.724	33.068			4.904	34.328			4.502	31.514			3.899	27.293			4.166	29.162			3.782	26.474
		SD			0.293038	2.05126			0.0695701	0.486991			0.0421637	0.295146			0.552344	3.86641			0.213981	1.49787			0.147573	1.03301			0.0295146	0.206602
		SE			0.13105	0.917353			0.0311127	0.217789			0.0188562	0.131993			0.247016	1.72911			0.0956951	0.669866			0.0659966	0.461976			0.0131993	0.0923953
	G5 CJB38-1	41	69.5	59.67	1.966	13.762	85.79	72.81	2.596	18.172	63.07	49.88	2.638	18.466	70.73	59.33	2.28	15.96	75.26	62.2	2.612	18.284	42.92	30.81	2.422	16.954	62.3	51.05	2.25	15.75
		42			1.966	13.762			2.596	18.172			2.638	18.466			2.28	15.96			2.612	18.284			2.422	16.954			2.25	15.75
		43			1.966	13.762			2.596	18.172			2.638	18.466			2.28	15.96			2.612	18.284			2.422	16.954			2.25	15.75
		44			1.966	13.762			2.596	18.172			2.638	18.466			2.28	15.96			2.612	18.284			2.422	16.954			2.25	15.75
		45			1.966	13.762			2.596	18.172			2.638	18.466			2.28	15.96			2.612	18.284			2.422	16.954			2.25	15.75
		46	67.87	56.73	2.228	15.596	67.98	57.25	2.146	15.022	67.81	55.08	2.546	17.822	52.71	41.68	2.206	15.442	76.14	65.08	2.212	15.484	40.25	32.73	1.504	10.528	83.91	71.91	2.4	16.8
		47			2.228	15.596			2.146	15.022			2.546	17.822			2.206	15.442			2.212	15.484			1.504	10.528			2.4	16.8
		48			2.228	15.596			2.146	15.022			2.546	17.822			2.206	15.442			2.212	15.484			1.504	10.528			2.4	16.8
		49			2.228	15.596			2.146	15.022			2.546	17.822			2.206	15.442			2.212	15.484			1.504	10.528			2.4	16.8
		50			2.228	15.596			2.146	15.022			2.546	17.822			2.206	15.442			2.212	15.484			1.504	10.528			2.4	16.8
		Mean			2.097	14.679			2.371	16.597			2.592	18.144			2.243	15.701			2.412	16.884			1.963	13.741			2.325	16.275
		SD			0.138086	0.966603			0.237171	1.6602			0.0484883	0.339418			0.0390014	0.27301			0.210819	1.47573			0.483828	3.3868			0.0790569	0.553399
		SE			0.061754	0.432278			0.106066	0.742462			0.0216846	0.151792			0.017442	0.122094			0.0942809	0.659966			0.216375	1.51462			0.0353553	0.247487
	G6 CJB38-2	51	96.59	84.86	2.346	16.422	62.67	51.95	2.144	15.008	60.92	49.65	2.254	15.778	64.6	54.01	2.118	14.826	70.94	57.87	2.614	18.298	39.75	29.54	2.042	14.294	90	80.08	1.984	13.888
		52			2.346	16.422			2.144	15.008			2.254	15.778			2.118	14.826			2.614	18.298			2.042	14.294			1.984	13.888
		53			2.346	16.422			2.144	15.008			2.254	15.778			2.118	14.826			2.614	18.298			2.042	14.294			1.984	13.888
		54			2.346	16.422			2.144	15.008			2.254	15.778			2.118	14.826			2.614	18.298			2.042	14.294			1.984	13.888
		55			2.346	16.422			2.144	15.008			2.254	15.778			2.118	14.826			2.614	18.298			2.042	14.294			1.984	13.888
		56	68.86	57.92	2.188	15.316	60.66	48.23	2.486	17.402	56.21	42.78	2.686	18.802	63.9	51.26	2.528	17.696	70.03	57.96	2.414	16.898	38.62	26.32	2.46	17.22	75.76	64.22	2.308	16.156
		57			2.188	15.316			2.486	17.402			2.686	18.802			2.528	17.696			2.414	16.898			2.46	17.22			2.308	16.156
		58			2.188	15.316			2.486	17.402			2.686	18.802			2.528	17.696			2.414	16.898			2.46	17.22			2.308	16.156
		59			2.188	15.316			2.486	17.402			2.686	18.802			2.528	17.696			2.414	16.898			2.46	17.22			2.308	16.156
		60			2.188	15.316			2.486	17.402			2.686	18.802			2.528	17.696			2.414	16.898			2.46	17.22			2.308	16.156
		Mean			2.267	15.869			2.315	16.205			2.47	17.29			2.323	16.261			2.514	17.598			2.251	15.757			2.146	15.022
		SD			0.0832733	0.582913			0.18025	1.26175			0.227684	1.59379			0.216089	1.51262			0.105409	0.737865			0.220305	1.54214			0.170763	1.19534
		SE			0.037241	0.260687			0.0806102	0.564271			0.101823	0.712764			0.0966379	0.676465			0.0471405	0.329983			0.0985235	0.689665			0.0763675	0.534573
	G7 CJB38-3	61	72.91	55.45	3.492	24.444	58	43.92	2.816	19.712	44.2	32.25	2.39	16.73	62.55	52.41	2.028	14.196	69.31	58.1	2.242	15.694	39.84	27.83	2.402	16.814	77.27	65.51	2.352	16.464
		62			3.492	24.444			2.816	19.712			2.39	16.73			2.028	14.196			2.242	15.694			2.402	16.814			2.352	16.464
		63			3.492	24.444			2.816	19.712			2.39	16.73			2.028	14.196			2.242	15.694			2.402	16.814			2.352	16.464
		64			3.492	24.444			2.816	19.712			2.39	16.73			2.028	14.196			2.242	15.694			2.402	16.814			2.352	16.464
		65			3.492	24.444			2.816	19.712			2.39	16.73			2.028	14.196			2.242	15.694			2.402	16.814			2.352	16.464
		66	60.3	48.52	2.356	16.492	64.35	56.55	1.95	13.65	48.36	37.72	2.66	18.62	60.21	51.06	2.2875	16.0125	74.53	64.45	2.52	17.64	36.83	30.72	1.5275	10.6925	92.35	81.65	2.675	18.725
		67			2.356	16.492			1.95	13.65			2.66	18.62			2.2875	16.0125			2.52	17.64			1.5275	10.6925			2.675	18.725
		68			2.356	16.492			1.95	13.65			2.66	18.62			2.2875	16.0125			2.52	17.64			1.5275	10.6925			2.675	18.725
		69			2.356	16.492			1.95	13.65			2.66	18.62			2.2875	16.0125			2.52	17.64			1.5275	10.6925			2.675	18.725
		70			2.356	16.492	37.18	34.04	3.14	21.98	41.35	37.96	3.39	23.73	62.54	58.83	3.71	25.97	72.59	68.76	3.83	26.81	42.91	39.21	3.7	25.9	80.14	76.45	3.69	25.83
		Mean			2.924	20.468			2.502	17.514			2.598	18.186			2.3	16.1			2.512	17.584			2.182	15.274			2.615	18.305
		SD			0.598725	4.19107			0.485208	3.39646			0.308934	2.16254			0.511929	3.58351			0.483262	3.38283			0.687977	4.81584			0.410402	2.87282
		SE			0.267758	1.8743			0.216992	1.51894			0.138159	0.967115			0.228942	1.60259			0.216121	1.51285			0.307672	2.15371			0.183537	1.28476
	G8 CJB46-1	71	40.55	37.25	3.3	23.1	50.9	47.23	3.67	25.69	35.69	31.38	4.31	30.17	66.73	63.39	3.34	23.38	69.91	66.16	3.75	26.25	35.74	33.22	2.52	17.64	62.43	58.92	3.51	24.57
		72	66.78	56.49	2.5725	18.0075	69.94	59.47	2.6175	18.3225	22.63	19.02	3.61	25.27	77.25	73.26	3.99	27.93	78.96	72.12	6.84	47.88	39.61	36.13	3.48	24.36	81.7	78.29	3.41	23.87
		73			2.5725	18.0075			2.6175	18.3225	71.85	62.96	2.96333	20.7433	59.68	51.31	2.79	19.53	80.59	72.06	2.84333	19.9033	35.3	27.42	2.62667	18.3867	76.15	68.04	2.70333	18.9233
		74			2.5725	18.0075			2.6175	18.3225			2.96333	20.7433			2.79	19.53			2.84333	19.9033			2.62667	18.3867			2.70333	18.9233
		75			2.5725	18.0075			2.6175	18.3225			2.96333	20.7433			2.79	19.53			2.84333	19.9033			2.62667	18.3867			2.70333	18.9233
		76	69.28	58.81	2.094	14.658	60.55	50.14	2.082	14.574	62.1	50.26	2.368	16.576	67.84	57.76	2.016	14.112	71.95	60.58	2.274	15.918	35.32	24.54	2.156	15.092	70.91	60.47	2.088	14.616
		77			2.094	14.658			2.082	14.574			2.368	16.576			2.016	14.112			2.274	15.918			2.156	15.092			2.088	14.616
		78			2.094	14.658			2.082	14.574			2.368	16.576			2.016	14.112			2.274	15.918			2.156	15.092			2.088	14.616
		79			2.094	14.658			2.082	14.574			2.368	16.576			2.016	14.112			2.274	15.918			2.156	15.092			2.088	14.616
		80			2.094	14.658			2.082	14.574			2.368	16.576			2.016	14.112			2.274	15.918			2.156	15.092			2.088	14.616
		Mean			2.406	16.842			2.455	17.185			2.865	20.055			2.578	18.046			3.049	21.343			2.466	17.262			2.547	17.829
		SD			0.393961	2.75772			0.503046	3.52132			0.65888	4.61216			0.690285	4.83199			1.41394	9.8976			0.420192	2.94135			0.55766	3.90362
		SE			0.176185	1.23329			0.224969	1.57478			0.29466	2.06262			0.308705	2.16093			0.632334	4.42634			0.187916	1.31541			0.249393	1.74575
	G9 CJB46-2	81	72.4	60.45	2.39	16.73	65.84	54.28	2.312	16.184	63.87	48.16	3.142	21.994	54.93	44.98	1.99	13.93	78.56	68.1	2.092	14.644	37.78	26.25	2.306	16.142	73.7	62.91	2.158	15.106
		82			2.39	16.73			2.312	16.184			3.142	21.994			1.99	13.93			2.092	14.644			2.306	16.142			2.158	15.106
		83			2.39	16.73			2.312	16.184			3.142	21.994			1.99	13.93			2.092	14.644			2.306	16.142			2.158	15.106
		84			2.39	16.73			2.312	16.184			3.142	21.994			1.99	13.93			2.092	14.644			2.306	16.142			2.158	15.106
		85			2.39	16.73			2.312	16.184			3.142	21.994			1.99	13.93			2.092	14.644			2.306	16.142			2.158	15.106
		86	71.81	60.24	2.314	16.198	53.99	42.5	2.298	16.086	63.13	49.82	2.662	18.634	52.44	43.64	1.76	12.32	77.17	66.26	2.182	15.274	36.41	27.57	1.768	12.376	72.44	61.29	2.23	15.61
		87			2.314	16.198			2.298	16.086			2.662	18.634			1.76	12.32			2.182	15.274			1.768	12.376			2.23	15.61
		88			2.314	16.198			2.298	16.086			2.662	18.634			1.76	12.32			2.182	15.274			1.768	12.376			2.23	15.61
		89			2.314	16.198			2.298	16.086			2.662	18.634			1.76	12.32			2.182	15.274			1.768	12.376			2.23	15.61
		90			2.314	16.198			2.298	16.086			2.662	18.634			1.76	12.32			2.182	15.274			1.768	12.376			2.23	15.61
		Mean			2.352	16.464			2.305	16.135			2.902	20.314			1.875	13.125			2.137	14.959			2.037	14.259			2.194	15.358
		SD			0.0400555	0.280389			0.00737865	0.0516505			0.252982	1.77088			0.121221	0.848545			0.0474342	0.332039			0.283551	1.98486			0.0379473	0.265631
		SE			0.0179134	0.125394			0.00329983	0.0230988			0.113137	0.79196			0.0542115	0.379481			0.0212132	0.148492			0.126808	0.887655			0.0169706	0.118794
	G10 CJB46-3	91	91.18	78.37	2.562	17.934	44.95	30.97	2.796	19.572	68.22	53.36	2.972	20.804	57.2	45.24	2.392	16.744	81.24	69.06	2.436	17.052	33.1	20.52	2.516	17.612	90.92	80.16	2.152	15.064
		92			2.562	17.934			2.796	19.572			2.972	20.804			2.392	16.744			2.436	17.052			2.516	17.612			2.152	15.064
		93			2.562	17.934			2.796	19.572			2.972	20.804			2.392	16.744			2.436	17.052			2.516	17.612			2.152	15.064
		94			2.562	17.934			2.796	19.572			2.972	20.804			2.392	16.744			2.436	17.052			2.516	17.612			2.152	15.064
		95			2.562	17.934			2.796	19.572			2.972	20.804			2.392	16.744			2.436	17.052			2.516	17.612			2.152	15.064
		96	69.66	59.98	1.936	13.552	57.35	46.21	2.228	15.596	64.01	49.8	2.842	19.894	58.14	48.24	1.98	13.86	71.96	61.02	2.188	15.316	32.24	21.49	2.15	15.05	85.2	75.45	1.95	13.65
		97			1.936	13.552			2.228	15.596			2.842	19.894			1.98	13.86			2.188	15.316			2.15	15.05			1.95	13.65
		98			1.936	13.552			2.228	15.596			2.842	19.894			1.98	13.86			2.188	15.316			2.15	15.05			1.95	13.65
		99			1.936	13.552			2.228	15.596			2.842	19.894			1.98	13.86			2.188	15.316			2.15	15.05			1.95	13.65
		100			1.936	13.552			2.228	15.596			2.842	19.894			1.98	13.86			2.188	15.316			2.15	15.05			1.95	13.65
		Mean			2.249	15.743			2.512	17.584			2.907	20.349			2.186	15.302			2.312	16.184			2.333	16.331			2.051	14.357
		SD			0.329931	2.30952			0.299362	2.09554			0.068516	0.479612			0.217143	1.52			0.130707	0.914952			0.192899	1.35029			0.106463	0.745243
		SE			0.14755	1.03285			0.133879	0.937152			0.0306413	0.214489			0.0971093	0.679765			0.0584542	0.409179			0.086267	0.603869			0.0476119	0.333283
	G11 CJJ03-1	103	74.4	62.29	2.422	16.954	31.29	27.96	3.33	23.31	23.78	19.92	3.86	27.02	77.78	74.85	2.93	20.51	80.53	77.08	3.45	24.15	28.23	25.96	2.27	15.89	77.4	74.69	2.71	18.97
		101			2.422	16.954	44.72	32.82	2.975	20.825	64.01	49.34	3.6675	25.6725	58.52	48.03	2.6225	18.3575	81.49	71.76	2.4325	17.0275	34.77	25.65	2.28	15.96	74.31	64.92	2.3475	16.4325
		102			2.422	16.954			2.975	20.825			3.6675	25.6725			2.6225	18.3575			2.4325	17.0275			2.28	15.96			2.3475	16.4325
		104			2.422	16.954			2.975	20.825			3.6675	25.6725			2.6225	18.3575			2.4325	17.0275			2.28	15.96			2.3475	16.4325
		105			2.422	16.954			2.975	20.825			3.6675	25.6725			2.6225	18.3575			2.4325	17.0275			2.28	15.96			2.3475	16.4325
		106	62.9	50.72	2.436	17.052	59.41	48.28	2.226	15.582	64.55	51.22	2.666	18.662	59.98	50.46	1.904	13.328	73.37	60.77	2.52	17.64	36.92	24.53	2.478	17.346	87.15	74.58	2.514	17.598
		107			2.436	17.052			2.226	15.582			2.666	18.662			1.904	13.328			2.52	17.64			2.478	17.346			2.514	17.598
		108			2.436	17.052			2.226	15.582			2.666	18.662			1.904	13.328			2.52	17.64			2.478	17.346			2.514	17.598
		109			2.436	17.052			2.226	15.582			2.666	18.662			1.904	13.328			2.52	17.64			2.478	17.346			2.514	17.598
		110			2.436	17.052			2.226	15.582			2.666	18.662			1.904	13.328			2.52	17.64			2.478	17.346			2.514	17.598
		Mean			2.429	17.003			2.636	18.452			3.186	22.302			2.294	16.058			2.578	18.046			2.378	16.646			2.467	17.269
		SD			0.00737865	0.0516505			0.444949	3.11465			0.551125	3.85787			0.421195	2.94836			0.309459	2.16621			0.105451	0.73816			0.118891	0.832235
		SE			0.00329983	0.0230988			0.198987	1.39291			0.24647	1.72529			0.188364	1.31855			0.138394	0.968761			0.0471593	0.330115			0.0531695	0.372187
	G12 CJJ03-2	111	65.15	52.53	2.524	17.668	70.66	59.71	2.19	15.33	44.63	41.48	3.15	22.05	55.1	51.86	3.24	22.68	79.57	75.12	4.45	31.15	31.31	27.87	3.44	24.08	102.61	99.41	3.2	22.4
		112			2.524	17.668			2.19	15.33	55.27	43.58	2.9225	20.4575	52.53	43.96	2.1425	14.9975	77.55	67.87	2.42	16.94	32.36	23.82	2.135	14.945	97.26	87.95	2.3275	16.2925
		113			2.524	17.668			2.19	15.33			2.9225	20.4575			2.1425	14.9975			2.42	16.94			2.135	14.945			2.3275	16.2925
		114			2.524	17.668			2.19	15.33			2.9225	20.4575			2.1425	14.9975			2.42	16.94			2.135	14.945			2.3275	16.2925
		115			2.524	17.668			2.19	15.33			2.9225	20.4575			2.1425	14.9975			2.42	16.94			2.135	14.945			2.3275	16.2925
		117	53.14	49.99	3.15	22.05	41.41	37.82	3.59	25.13	46.41	42.53	3.88	27.16	60.43	54.88	5.55	38.85	77.43	73.29	4.14	28.98	44.78	41.1	3.68	25.76	82.35	77.69	4.66	32.62
		116	80.28	70.54	2.435	17.045	64.79	55.97	2.205	15.435	75.07	63.48	2.8975	20.2825	58.02	49.05	2.2425	15.6975	78.55	68.53	2.505	17.535	53.68	43.95	2.4325	17.0275	99.94	89.31	2.6575	18.6025
		118			2.435	17.045			2.205	15.435			2.8975	20.2825			2.2425	15.6975			2.505	17.535			2.4325	17.0275			2.6575	18.6025
		119			2.435	17.045			2.205	15.435			2.8975	20.2825			2.2425	15.6975			2.505	17.535			2.4325	17.0275			2.6575	18.6025
		120			2.435	17.045			2.205	15.435			2.8975	20.2825			2.2425	15.6975			2.505	17.535			2.4325	17.0275			2.6575	18.6025
		Mean			2.551	17.857			2.336	16.352			3.031	21.217			2.633	18.431			2.829	19.803			2.539	17.773			2.78	19.46
		SD			0.215063	1.50544			0.440674	3.08472			0.307921	2.15545			1.07753	7.54272			0.777131	5.43992			0.558959	3.91271			0.714131	4.99892
		SE			0.0961792	0.673255			0.197075	1.37953			0.137707	0.963946			0.481887	3.37321			0.347543	2.4328			0.249974	1.74982			0.319369	2.23558
	G13 CJJ03-3	121	69.53	57.55	2.396	16.772	78.99	67.54	2.29	16.03	57.05	42.79	3.565	24.955	66.16	54.26	2.975	20.825	72.58	61.3	2.82	19.74	39.79	28.52	2.8175	19.7225	92.68	80.61	3.0175	21.1225
		123			2.396	16.772			2.29	16.03			3.565	24.955			2.975	20.825			2.82	19.74			2.8175	19.7225			3.0175	21.1225
		124			2.396	16.772			2.29	16.03			3.565	24.955			2.975	20.825			2.82	19.74			2.8175	19.7225			3.0175	21.1225
		125			2.396	16.772			2.29	16.03			3.565	24.955			2.975	20.825			2.82	19.74			2.8175	19.7225			3.0175	21.1225
		122			2.396	16.772			2.29	16.03	23.58	19.94	3.64	25.48	60.26	56.35	3.91	27.37	76.58	73.17	3.41	23.87	41.49	37.6	3.89	27.23	95.73	92.04	3.69	25.83
		126	61.95	51.6	2.5875	18.1125	65.91	55.63	2.57	17.99	67.23	55.23	3	21	55.49	44.73	2.69	18.83	78.44	68.08	2.59	18.13	63.64	53	2.66	18.62	78.92	68.11	2.7025	18.9175
		127			2.5875	18.1125			2.57	17.99			3	21			2.69	18.83			2.59	18.13			2.66	18.62			2.7025	18.9175
		129			2.5875	18.1125			2.57	17.99			3	21			2.69	18.83			2.59	18.13			2.66	18.62			2.7025	18.9175
		130			2.5875	18.1125			2.57	17.99			3	21			2.69	18.83			2.59	18.13			2.66	18.62			2.7025	18.9175
		128	48.16	45.88	2.28	15.96	42.37	41.32	1.05	7.35	38.81	34.44	4.37	30.59	60.27	56.93	3.34	23.38	81.5	78.7	2.8	19.6	55.94	52.55	3.39	23.73	84.14	81.16	2.98	20.86
		Mean			2.461	17.227			2.278	15.946			3.427	23.989			2.991	20.937			2.785	19.495			2.919	20.433			2.955	20.685
		SD			0.114453	0.80117			0.453353	3.17347			0.439711	3.07798			0.384388	2.69072			0.246723	1.72706			0.404724	2.83307			0.300278	2.10194
		SE			0.0511849	0.358294			0.202746	1.41922			0.196645	1.37651			0.171904	1.20333			0.110338	0.772365			0.180998	1.26699			0.134288	0.940018

## Sheet: Organ weight
	Absolute organ weight														Relative organ weight
	Group	A. No	body weight (g)	Adipose tissue				Liver	spleen	Kidney		Femoral muscle (L)			Group	A. No	body weight (g)	Adipose tissue				Liver	spleen	Kidney		Femoral muscle (L)
				mesenteric fat	subcutaneous fat	epididymal fat	Brown fat			L	R							mesenteric fat	subcutaneous fat	epididymal fat	Brown fat			L	R
	G1 ND	1	20.02	0.0344	0.0159	0.2139	0.0657	0.867	0.0417	0.1473	0.1433	0.5815			G1 ND	1	20.02	0.171828	0.0794206	1.06843	0.328172	4.33067	0.208292	0.735764	0.715784	2.9046
		2	22.66	0.1615	0.1854	0.4249	0.129	0.8803	0.0374	0.1428	0.149	0.5396				2	22.66	0.71271	0.818182	1.87511	0.569285	3.88482	0.165049	0.630185	0.657546	2.38129
		3	21.55	0.122	0.1227	0.3103	0.1061	0.8743	0.0376	0.1339	0.1356	0.5622				3	21.55	0.566125	0.569374	1.43991	0.492343	4.05708	0.174478	0.621346	0.629234	2.60882
		4	22.35	0.2692	0.1845	1.0804	0.0851	0.9099	0.0408	0.1304	0.1296	0.552				4	22.35	1.20447	0.825503	4.834	0.380761	4.07114	0.18255	0.583445	0.579866	2.4698
		5	22.02	0.086	0.0914	0.284	0.0816	0.9805	0.0591	0.139	0.1434	0.5485				5	22.02	0.390554	0.415077	1.28974	0.370572	4.45277	0.268392	0.631244	0.651226	2.49092
		6	23.96	0.1771	0.2343	0.4478	0.079	0.9621	0.0354	0.1539	0.1471	0.6756				6	23.96	0.739149	0.97788	1.86895	0.329716	4.01544	0.147746	0.642321	0.61394	2.8197
		7	24.08	0.1683	0.221	0.5415	0.0951	0.9549	0.0406	0.1354	0.1399	0.6532				7	24.08	0.69892	0.917774	2.24875	0.394934	3.96553	0.168605	0.562292	0.58098	2.71262
		8	25.1	0.0926	0.171	0.3172	0.0831	0.9618	0.0437	0.1625	0.147	0.6003				8	25.1	0.368924	0.681275	1.26375	0.331076	3.83187	0.174104	0.64741	0.585657	2.39163
		9	25.34	0.2136	0.2665	0.6033	0.074	0.943	0.0617	0.1465	0.1523	0.6131				9	25.34	0.842936	1.0517	2.38082	0.292028	3.72139	0.243489	0.578137	0.601026	2.41949
		10	25.91	0.0446	0.1875	0.8597	0.0442	1.0048	0.0567	0.1568	0.1716	0.6716				10	25.91	0.172134	0.723659	3.31802	0.170591	3.87804	0.218834	0.605172	0.662293	2.59205
		Mean	23.299	0.13693	0.16802	0.5083	0.08429	0.93386	0.04547	0.14485	0.14588	0.59976				Mean	23.299	0.586775	0.705984	2.15875	0.365948	4.02088	0.195154	0.623732	0.627755	2.57909
		SD	1.88647	0.0748288	0.0737302	0.275727	0.0228217	0.0480423	0.00981292	0.0105482	0.0112274	0.0518746				SD	1.88647	0.321338	0.290969	1.15395	0.108519	0.22454	0.0384731	0.0487424	0.0441479	0.183238
		SE	0.596556	0.023663	0.0233155	0.0871925	0.00721687	0.0151923	0.00310312	0.00333564	0.00355042	0.0164042				SE	0.596556	0.101616	0.0920125	0.364913	0.0343167	0.0710057	0.0121663	0.0154137	0.0139608	0.0579449
	G2 HFD	11	36.67	0.6103	0.2698	2.4686	0.0966	0.9557	0.0714	0.1733	0.1793	0.674			G2 HFD	11	36.67	1.6643	0.735751	6.73193	0.263431	2.60622	0.19471	0.472593	0.488956	1.83801
		12	39.21	0.6509	0.614	2.839	0.1325	0.9469	0.0584	0.1568	0.1695	0.6431				12	39.21	1.66004	1.56593	7.2405	0.337924	2.41495	0.148942	0.399898	0.432288	1.64014
		13	37.71	0.5241	0.5859	2.5602	0.1623	0.878	0.0555	0.1671	0.1694	0.6811				13	37.71	1.38982	1.5537	6.78918	0.43039	2.32829	0.147176	0.443119	0.449218	1.80615
		14	34	0.394	0.6255	2.4633	0.1196	1.0176	0.0671	0.1897	0.2007	0.6248				14	34	1.15882	1.83971	7.245	0.351765	2.99294	0.197353	0.557941	0.590294	1.83765
		15	36.6	0.6615	0.6363	2.1156	0.1025	0.9141	0.0836	0.1725	0.1761	0.7276				15	36.6	1.80738	1.73852	5.78033	0.280055	2.49754	0.228415	0.471311	0.481148	1.98798
		16	34.29	0.399	0.533	1.7889	0.102	0.8097	0.0646	0.1642	0.141	0.6386				16	34.29	1.1636	1.55439	5.21697	0.297463	2.36133	0.188393	0.478857	0.411199	1.86235
		17	35.13	0.4746	0.9516	2.6518	0.1172	0.819	0.0468	0.1601	0.1578	0.6263				17	35.13	1.35098	2.7088	7.54853	0.333618	2.33134	0.133219	0.455736	0.449189	1.78281
		18	35.39	0.7882	0.5438	2.1586	0.1325	0.7676	0.0543	0.154	0.1494	0.6219				18	35.39	2.22718	1.53659	6.09946	0.3744	2.16897	0.153433	0.435151	0.422153	1.75728
		19	37.05	0.6033	0.955	2.9298	0.0965	0.8701	0.0585	0.1879	0.165	0.7214				19	37.05	1.62834	2.5776	7.90769	0.260459	2.34845	0.157895	0.507152	0.445344	1.9471
		20	37.5	0.75	0.7351	2.686	0.1074	0.8175	0.0579	0.144	0.1543	0.6121				20	37.5	2	1.96027	7.16267	0.2864	2.18	0.1544	0.384	0.411467	1.63227
		Mean	36.355	0.58559	0.645	2.46618	0.11691	0.87962	0.06181	0.16696	0.16625	0.65709				Mean	36.355	1.60505	1.77712	6.77223	0.32159	2.423	0.170394	0.460576	0.458125	1.80917
		SD	1.63919	0.136078	0.20185	0.353048	0.020825	0.0786033	0.0103383	0.0144512	0.0170355	0.041847				SD	1.63919	0.348953	0.561166	0.839601	0.0543787	0.239057	0.0299804	0.0502919	0.0533463	0.114857
		SE	0.518357	0.0430317	0.0638307	0.111644	0.00658545	0.0248566	0.00326927	0.00456986	0.00538709	0.0132332				SE	0.518357	0.110349	0.177456	0.265505	0.0171961	0.0755963	0.00948063	0.0159037	0.0168696	0.0363211
	G3 OLS (40)	21	28.7	0.2966	0.401	1.398	0.1315	0.8915	0.0476	0.1454	0.1657	0.5914			G3 OLS (40)	21	28.7	1.03345	1.39721	4.87108	0.458188	3.10627	0.165854	0.50662	0.577352	2.06063
		22	32.29	0.4361	0.2281	1.2147	0.1578	0.7462	0.0823	0.2389	0.2013	0.6551				22	32.29	1.35057	0.706411	3.76185	0.488696	2.31093	0.254878	0.739858	0.623413	2.0288
		23	31.3	0.593	0.2374	1.5604	0.1355	0.8908	0.0468	0.1586	0.168	0.6301				23	31.3	1.89457	0.758466	4.9853	0.432907	2.84601	0.149521	0.506709	0.536741	2.0131
		24	27.93	0.3258	0.1706	1.0278	0.129	0.8443	0.0562	0.1689	0.1698	0.5776				24	27.93	1.16649	0.610813	3.67991	0.461869	3.02291	0.201217	0.604726	0.607948	2.06803
		25	30.62	0.4359	0.2103	1.2208	0.099	0.9143	0.0506	0.1703	0.1717	0.6572				25	30.62	1.42358	0.686806	3.98694	0.323318	2.98596	0.165251	0.556172	0.560745	2.14631
		26	33.23	0.5073	0.3424	1.5176	0.1112	0.9239	0.0615	0.1766	0.1617	0.6709				26	33.23	1.52663	1.03039	4.56696	0.334637	2.78032	0.185074	0.531447	0.486608	2.01896
		27	28.52	0.3159	0.3407	0.8589	0.0482	0.9244	0.0531	0.1614	0.1769	0.6293				27	28.52	1.10764	1.1946	3.01157	0.169004	3.24123	0.186185	0.565919	0.620266	2.20652
		28	31.24	0.6701	0.0858	1.4128	0.1101	0.9135	0.061	0.173	0.1615	0.6492				28	31.24	2.14501	0.274648	4.52241	0.352433	2.92414	0.195262	0.553777	0.516965	2.0781
		29	29.62	0.3509	0.5208	1.182	0.0741	0.8135	0.0691	0.16	0.147	0.662				29	29.62	1.18467	1.75827	3.99055	0.250169	2.74646	0.233288	0.540176	0.496286	2.23498
		30	29.97	0.3141	0.2914	1.1714	0.072	0.8301	0.0522	0.163	0.1539	0.6427				30	29.97	1.04805	0.972306	3.90858	0.24024	2.76977	0.174174	0.543877	0.513514	2.14448
		Mean	30.342	0.42457	0.28285	1.25644	0.10684	0.86925	0.05804	0.17161	0.16775	0.63655				Mean	30.342	1.38807	0.938993	4.12851	0.351146	2.8734	0.19107	0.564928	0.553984	2.09999
		SD	1.71367	0.129671	0.12441	0.218882	0.0338838	0.0590478	0.0109756	0.0252394	0.0146494	0.0305574				SD	1.71367	0.374439	0.428864	0.605858	0.108548	0.253808	0.0322291	0.0677841	0.0515231	0.078831
		SE	0.54191	0.0410056	0.039342	0.0692165	0.010715	0.0186725	0.00347081	0.00798139	0.00463255	0.00966309				SE	0.54191	0.118408	0.135619	0.191589	0.0343258	0.0802612	0.0101917	0.0214352	0.016293	0.0249285
	G5 CJB38-1	41	35.2	0.809	0.1917	2.5953	0.1551	0.8374	0.0418	0.1585	0.1663	0.5902			G5 CJB38-1	41	35.2	2.2983	0.544602	7.37301	0.440625	2.37898	0.11875	0.450284	0.472443	1.6767
		42	33.72	0.5092	0.2812	1.9607	0.1088	0.8079	0.0515	0.1478	0.165	0.612				42	33.72	1.51008	0.833926	5.81465	0.322657	2.39591	0.152728	0.438316	0.489324	1.81495
		43	33.89	0.4894	0.2234	1.9065	0.108	0.8783	0.0604	0.1628	0.1804	0.7382				43	33.89	1.44408	0.659192	5.62555	0.318678	2.59162	0.178224	0.480378	0.53231	2.17822
		44	33.63	0.4853	0.4073	2.3481	0.1409	0.7642	0.0541	0.1443	0.1466	0.5991				44	33.63	1.44306	1.21112	6.98216	0.418971	2.27238	0.160868	0.429081	0.43592	1.78145
		45	32.77	0.4392	0.3466	1.6904	0.0899	0.7834	0.0569	0.1367	0.1499	0.6071				45	32.77	1.34025	1.05767	5.15838	0.274336	2.3906	0.173634	0.41715	0.457431	1.85261
		46	34.03	0.5042	0.3731	2.2087	0.092	0.7524	0.0493	0.1509	0.14054	0.5654				46	34.03	1.48163	1.09639	6.49045	0.27035	2.21099	0.144872	0.443432	0.412989	1.66148
		47	37.77	0.5923	0.3682	2.3538	0.1485	0.8391	0.047	0.1509	0.1654	0.6361				47	37.77	1.56818	0.974848	6.23193	0.393169	2.2216	0.124437	0.399523	0.437914	1.68414
		48	34.32	0.6165	0.4409	2.1801	0.1429	0.8352	0.0504	0.1439	0.1588	0.6328				48	34.32	1.79633	1.28467	6.35227	0.416375	2.43357	0.146853	0.419289	0.462704	1.84382
		49	36.32	0.432	0.5036	2.3881	0.1058	0.8267	0.0572	0.1676	0.1765	0.6557				49	36.32	1.18943	1.38656	6.57517	0.2913	2.27616	0.157489	0.461454	0.485958	1.80534
		50	37.15	0.7158	0.5468	2.7083	0.0967	0.7872	0.0468	0.1501	0.1453	0.5926				50	37.15	1.92678	1.47187	7.29017	0.260296	2.11898	0.125976	0.404038	0.391117	1.59515
		Mean	34.88	0.55929	0.36828	2.234	0.11886	0.81118	0.05154	0.15135	0.159474	0.62292				Mean	34.88	1.59981	1.05209	6.38937	0.340676	2.32908	0.148383	0.434294	0.457811	1.78939
		SD	1.66858	0.123711	0.114127	0.314044	0.0251583	0.0391715	0.00567728	0.00931358	0.0135699	0.0481556				SD	1.66858	0.323357	0.304584	0.717276	0.06965	0.135909	0.0204234	0.0255765	0.0406966	0.162271
		SE	0.527651	0.039121	0.03609	0.0993094	0.00795576	0.0123871	0.00179531	0.00294521	0.00429119	0.0152282				SE	0.527651	0.102254	0.0963179	0.226823	0.0220253	0.0429781	0.00645845	0.00808799	0.0128694	0.0513146
	G6 CJB38-2	51	32.41	0.3717	0.4382	1.9414	0.1241	0.7988	0.0498	0.1655	0.1618	0.6443			G6 CJB38-2	51	32.41	1.14687	1.35205	5.99013	0.382907	2.46467	0.153656	0.510645	0.499229	1.98797
		52	31.62	0.3699	0.2341	1.8437	0.141	0.7635	0.0486	0.1432	0.1552	0.6165				52	31.62	1.16983	0.740354	5.8308	0.44592	2.41461	0.1537	0.452878	0.490829	1.94972
		53	28.45	0.2692	0.1845	1.0804	0.0851	0.8345	0.0598	0.1754	0.1799	0.6021				53	28.45	0.946221	0.648506	3.79754	0.299121	2.93322	0.210193	0.61652	0.632337	2.11634
		54	31.11	0.3902	0.581	1.7118	0.1068	0.757	0.0449	0.1443	0.1466	0.5991				54	31.11	1.25426	1.86757	5.50241	0.343298	2.4333	0.144327	0.463838	0.471231	1.92575
		55	34.29	0.3933	0.2875	1.9728	0.128	0.825	0.0567	0.1808	0.1894	0.6506				55	34.29	1.14698	0.838437	5.75328	0.373287	2.40595	0.165354	0.527267	0.552348	1.89735
		56	35.5	0.5453	0.5599	2.4051	0.1362	0.8201	0.0651	0.1553	0.1539	0.6365				56	35.5	1.53606	1.57718	6.77493	0.383662	2.31014	0.18338	0.437465	0.433521	1.79296
		57	33.44	0.4262	0.3379	2.1704	0.1273	0.7322	0.0543	0.1436	0.13	0.6406				57	33.44	1.27452	1.01047	6.49043	0.380682	2.18959	0.16238	0.429426	0.388756	1.91567
		58	39.59	0.8895	0.6695	2.7856	0.1293	0.9193	0.0628	0.1586	0.1608	0.7512				58	39.59	2.24678	1.69108	7.03612	0.326598	2.32205	0.158626	0.400606	0.406163	1.89745
		59	37.26	0.4839	0.389	2.3497	0.0976	0.8963	0.0676	0.1584	0.1571	0.7007				59	37.26	1.29871	1.04402	6.30623	0.261943	2.40553	0.181428	0.425121	0.421632	1.88057
		60	39.54	0.7221	0.5807	2.6933	0.1614	0.8796	0.0484	0.1434	0.164	0.6234				60	39.54	1.82625	1.46864	6.81158	0.408194	2.22458	0.122408	0.362671	0.41477	1.57663
		Mean	34.321	0.48613	0.42623	2.09542	0.12368	0.82263	0.0558	0.15685	0.15987	0.6465				Mean	34.321	1.38465	1.22383	6.02935	0.360561	2.41036	0.163545	0.462644	0.471082	1.89404
		SD	3.67471	0.187667	0.166262	0.503272	0.0221022	0.062111	0.00785423	0.0137465	0.0164259	0.046795				SD	3.67471	0.387171	0.424929	0.933716	0.0538586	0.204941	0.0239779	0.0724521	0.0758718	0.139038
		SE	1.16205	0.0593454	0.0525767	0.159148	0.00698934	0.0196412	0.00248372	0.00434701	0.00519434	0.0147979				SE	1.16205	0.122434	0.134374	0.295267	0.0170316	0.0648082	0.00758248	0.0229114	0.0239928	0.0439677
	G7 CJB38-3	61	31.81	0.2828	0.5393	1.46	0.0974	0.8453	0.0515	0.1514	0.1698	0.6714			G7 CJB38-3	61	31.81	0.889029	1.69538	4.58975	0.306193	2.65734	0.161899	0.475951	0.533794	2.11066
		62	35.63	0.74	0.1972	1.9842	0.1108	0.8709	0.0535	0.1531	0.1653	0.6441				62	35.63	2.0769	0.553466	5.5689	0.310974	2.44429	0.150154	0.429694	0.463935	1.80775
		63	37.67	0.5645	0.3841	2.9458	0.1644	0.8633	0.0634	0.161	0.1643	0.617				63	37.67	1.49854	1.01964	7.82002	0.436422	2.29174	0.168304	0.427396	0.436156	1.63791
		64	32.87	0.4341	0.316	1.8276	0.1031	0.8427	0.0629	0.1687	0.1599	0.6179				64	32.87	1.32066	0.961363	5.56009	0.31366	2.56374	0.19136	0.513234	0.486462	1.87983
		65	28.16	0.1791	0.3855	0.9659	0.0654	0.7988	0.0683	0.1586	0.1687	0.569				65	28.16	0.636009	1.36896	3.43004	0.232244	2.83665	0.242543	0.56321	0.599077	2.0206
		66	39.62	0.8591	0.5087	2.4516	0.1286	0.9181	0.0648	0.169	0.1763	0.5674				66	39.62	2.16835	1.28395	6.18778	0.324584	2.31726	0.163554	0.426552	0.444977	1.4321
		67	34.55	0.526	0.4249	1.6838	0.1371	0.6371	0.0841	0.1871	0.1993	0.5671				67	34.55	1.52243	1.22981	4.87352	0.396816	1.84399	0.243415	0.541534	0.576845	1.64139
		68	33.65	0.4121	0.2699	1.8099	0.0953	0.8136	0.0471	0.1349	0.1487	0.6227				68	33.65	1.22467	0.80208	5.3786	0.28321	2.41783	0.13997	0.400892	0.441902	1.85052
		69	39.66	0.771	0.8697	3.1231	0.1284	0.8908	0.052	0.144	0.1561	0.6404				69	39.66	1.94402	2.19289	7.87468	0.323752	2.24609	0.131114	0.363086	0.393596	1.61473
		70	33.13	0.2571	0.5538	1.9473	0.0798	1.0104	0.0512	0.1778	0.1724	0.579				70	33.13	0.776034	1.6716	5.87775	0.240869	3.0498	0.154543	0.536674	0.520374	1.74766
		Mean	34.675	0.50258	0.44491	2.01992	0.11103	0.8491	0.05988	0.16056	0.16808	0.6096				Mean	34.675	1.40566	1.27791	5.71611	0.316872	2.46687	0.174686	0.467822	0.489712	1.77431
		SD	3.59861	0.232376	0.189008	0.657072	0.0292346	0.0954429	0.0111301	0.0156891	0.0136312	0.0371561				SD	3.59861	0.541607	0.482497	1.36215	0.0623792	0.335806	0.0395048	0.068021	0.0662528	0.203143
		SE	1.13798	0.0734836	0.0597696	0.207785	0.00924481	0.0301817	0.00351965	0.00496134	0.00431058	0.0117498				SE	1.13798	0.171271	0.152579	0.430751	0.0197261	0.106191	0.0124925	0.0215101	0.020951	0.0642393
	G8 CJB46-1	71	29.63	0.1879	0.2942	0.9977	0.1039	0.9638	0.0556	0.1914	0.1962	0.6598			G8 CJB46-1	71	29.63	0.634155	0.992913	3.3672	0.350658	3.25278	0.187648	0.645967	0.662167	2.2268
		72	26.77	0.1148	0.2076	0.5062	0.0894	1.0701	0.1399	0.1974	0.2016	0.599				72	26.77	0.428838	0.775495	1.89092	0.333956	3.99739	0.5226	0.737393	0.753082	2.23758
		73	32.62	0.497	0.423	1.7301	0.1331	0.811	0.0576	0.1764	0.1768	0.5821				73	32.62	1.52361	1.29675	5.3038	0.408032	2.4862	0.176579	0.540773	0.541999	1.78449
		74	35.92	0.5421	0.2948	1.9419	0.1216	0.7769	0.084	0.2075	0.2287	0.693				74	35.92	1.50919	0.820713	5.40618	0.33853	2.16286	0.233853	0.577673	0.636693	1.92929
		75	34.23	0.5369	0.3351	2.1193	0.1241	0.8311	0.0598	0.1639	0.1563	0.6354				75	34.23	1.56851	0.978966	6.19135	0.362547	2.42799	0.174701	0.47882	0.456617	1.85627
		76	33.42	0.506	0.3476	1.8501	0.147	0.7768	0.0549	0.1678	0.1764	0.6554				76	33.42	1.51406	1.0401	5.53591	0.439856	2.32436	0.164273	0.502095	0.527828	1.9611
		77	33.19	0.4846	0.531	2.54681	0.1326	0.7339	0.0466	0.1179	0.1327	0.612				77	33.19	1.46008	1.59988	7.67343	0.399518	2.21121	0.140404	0.355227	0.399819	1.84393
		78	35.08	0.6379	0.3689	2.9824	0.1343	0.767	0.045	0.1298	0.158	0.6037				78	35.08	1.81842	1.0516	8.50171	0.382839	2.18643	0.128278	0.370011	0.450399	1.72092
		79	34.32	0.4369	0.3358	2.0178	0.0859	0.7983	0.0419	0.1554	0.1796	0.6504				79	34.32	1.27302	0.978438	5.87937	0.250291	2.32605	0.122086	0.452797	0.52331	1.8951
		80	39.79	0.8852	0.6439	2.9537	0.1373	0.85	0.0524	0.1465	0.1499	0.5753				80	39.79	2.22468	1.61825	7.42322	0.345062	2.13622	0.131691	0.368183	0.376728	1.44584
		Mean	33.497	0.48293	0.37819	1.9646	0.12092	0.83789	0.06377	0.1654	0.17562	0.62661				Mean	33.497	1.39545	1.11531	5.71731	0.361129	2.55115	0.198211	0.502894	0.532864	1.89013
		SD	3.5003	0.215423	0.126379	0.782475	0.020903	0.103037	0.0291719	0.0290254	0.0281291	0.0381456				SD	3.5003	0.52419	0.295326	1.9778	0.0519046	0.603407	0.1189	0.126133	0.120595	0.231211
		SE	1.10689	0.0681228	0.0399646	0.24744	0.00661012	0.0325831	0.00922495	0.00917862	0.00889519	0.0120627				SE	1.10689	0.165763	0.0933902	0.625436	0.0164137	0.190814	0.0375995	0.0398868	0.0381356	0.0731153
	G9 CJB46-2	81	30.11	0.2633	0.3542	1.7222	0.108	0.761	0.0481	0.1517	0.1392	0.6293			G9 CJB46-2	81	30.11	0.87446	1.17635	5.71969	0.358685	2.5274	0.159748	0.503819	0.462305	2.09
		82	35.26	0.5856	0.4101	2.5647	0.1497	0.8119	0.0612	0.1556	0.1524	0.5164				82	35.26	1.66081	1.16307	7.27368	0.42456	2.30261	0.173568	0.441293	0.432218	1.46455
		83	31.55	0.3348	0.2397	1.7491	0.1102	0.7602	0.0494	0.1391	0.149	0.6151				83	31.55	1.06117	0.759746	5.5439	0.349287	2.40951	0.156577	0.440887	0.472266	1.9496
		84	31.38	0.9879	0.229	1.8442	0.0873	0.7817	0.629	0.1668	0.1784	0.5529				84	31.38	3.14818	0.729764	5.87699	0.278203	2.49108	2.00446	0.531549	0.568515	1.76195
		85	36.06	0.5518	0.4198	1.9247	0.1305	0.9649	0.0687	0.178	0.1976	0.746				85	36.06	1.53023	1.16417	5.33749	0.361897	2.67582	0.190516	0.493622	0.547976	2.06877
		86	33.21	0.5601	0.399	2.0732	0.117	0.7731	0.0465	0.1409	0.1643	0.6394				86	33.21	1.68654	1.20145	6.2427	0.352304	2.32791	0.140018	0.42427	0.494731	1.92532
		87	32.8	0.4496	0.3637	2.0976	0.113	0.746	0.0459	0.143	0.1515	0.5986				87	32.8	1.37073	1.10884	6.39512	0.344512	2.27439	0.139939	0.435976	0.46189	1.825
		88	32.02	0.3636	0.3141	1.962	0.13	0.7588	0.054	0.1462	0.1366	0.556				88	32.02	1.13554	0.980949	6.12742	0.405996	2.36977	0.168645	0.45659	0.426608	1.73641
		89	36.1	0.4566	0.6011	2.7199	0.1141	0.8881	0.0419	0.1554	0.1796	0.6504				89	36.1	1.26482	1.6651	7.53435	0.316066	2.46011	0.116066	0.430471	0.497507	1.80166
		90	35.76	0.5647	0.4378	2.1487	0.0906	0.796	0.046	0.1478	0.1621	0.6281				90	35.76	1.57914	1.22427	6.00867	0.253356	2.22595	0.128635	0.413311	0.4533	1.75643
		Mean	33.425	0.5118	0.37685	2.08063	0.11504	0.80417	0.10907	0.15245	0.16107	0.61322				Mean	33.425	1.53116	1.11737	6.206	0.344487	2.40645	0.337817	0.457179	0.481732	1.83797
		SD	2.21149	0.200225	0.106842	0.33009	0.0185976	0.0696932	0.182864	0.0121998	0.0193768	0.0638421				SD	2.21149	0.629228	0.263117	0.708998	0.0519511	0.135628	0.586019	0.039048	0.0465435	0.182743
		SE	0.699333	0.0633166	0.0337864	0.104384	0.00588107	0.0220389	0.0578268	0.00385793	0.00612748	0.0201886				SE	0.699333	0.198979	0.083205	0.224205	0.0164284	0.0428894	0.185316	0.0123481	0.0147183	0.0577884
	G10 CJB46-3	91	30.48	0.2802	0.4353	1.3692	0.086	1.0191	0.0707	0.1638	0.1881	0.6781			G10 CJB46-3	91	30.48	0.919291	1.42815	4.49213	0.282152	3.3435	0.231955	0.537402	0.617126	2.22474
		92	34.38	0.5116	0.2122	1.7262	0.1829	0.9233	0.0588	0.1607	0.159	0.5991				92	34.38	1.48807	0.617219	5.02094	0.531995	2.68557	0.17103	0.467423	0.462478	1.74258
		93	27.16	0.1147	0.1361	0.4522	0.0841	1.092	0.1637	0.1758	0.2018	0.5701				93	27.16	0.422312	0.501105	1.66495	0.309647	4.02062	0.602725	0.647275	0.743004	2.09904
		94	35.77	0.5939	0.3557	2.405	0.109	0.8951	0.059	0.1702	0.1451	0.6338				94	35.77	1.66033	0.994409	6.72351	0.304725	2.50238	0.164943	0.475818	0.405647	1.77188
		95	36.16	0.4632	0.3687	1.6125	0.1179	1.0521	0.0819	0.1892	0.1786	0.7748				95	36.16	1.28097	1.01963	4.45935	0.326051	2.90957	0.226493	0.52323	0.493916	2.1427
		96	34.68	0.4978	0.3461	1.8697	0.1049	0.9401	0.0613	0.1716	0.1766	0.649				96	34.68	1.43541	0.997982	5.39129	0.30248	2.71078	0.176759	0.49481	0.509227	1.8714
		97	35.03	0.486	0.4853	2.52	0.1076	0.773	0.0607	0.1302	0.1429	0.5878				97	35.03	1.38738	1.38538	7.19383	0.307165	2.20668	0.17328	0.371681	0.407936	1.67799
		98	34.01	0.4536	0.2984	2.018	0.1151	0.8235	0.0465	0.1459	0.1569	0.6211				98	34.01	1.33373	0.877389	5.93355	0.33843	2.42135	0.136724	0.428991	0.461335	1.82623
		99	36.58	0.5689	0.4487	2.7964	0.1141	0.8696	0.0464	0.1492	0.1566	0.5841				99	36.58	1.55522	1.22663	7.64461	0.311919	2.37726	0.126845	0.407873	0.428103	1.59677
		100	34.18	0.5531	0.4139	2.662	0.1176	0.8482	0.0481	0.1617	0.1692	0.6322				100	34.18	1.6182	1.21094	7.78818	0.344061	2.48157	0.140726	0.473084	0.495026	1.84962
		Mean	33.843	0.4523	0.35004	1.94312	0.11392	0.9236	0.06971	0.16183	0.16748	0.63301				Mean	33.843	1.31009	1.02588	5.63123	0.335862	2.76593	0.215148	0.482759	0.50238	1.88029
		SD	2.88838	0.14691	0.109143	0.707938	0.0270869	0.103482	0.0348304	0.0167621	0.0189153	0.059703				SD	2.88838	0.376139	0.304021	1.86383	0.0712515	0.544758	0.140557	0.0767743	0.104515	0.208519
		SE	0.913386	0.0464569	0.0345139	0.22387	0.00856564	0.032724	0.0110143	0.00530063	0.00598154	0.0188797				SE	0.913386	0.118946	0.09614	0.589394	0.0225317	0.172268	0.0444481	0.0242782	0.0330505	0.0659395
	G11 CJJ03-1	101	33.56	0.4606	0.3015	1.9634	0.1787	0.8299	0.051	0.1734	0.1616	0.6082			G11 CJJ03-1	101	33.56	1.37247	0.898391	5.85042	0.532479	2.47288	0.151967	0.516687	0.481526	1.81228
		102	32.09	0.426	0.3249	2.6001	0.148	0.823	0.049	0.186	0.1727	0.6446				102	32.09	1.32752	1.01246	8.10252	0.461203	2.56466	0.152696	0.57962	0.538174	2.00873
		103	30.7	0.2287	0.1726	1.2646	0.0854	1.0404	0.0709	0.1924	0.1994	0.6771				103	30.7	0.744951	0.562215	4.11922	0.278176	3.38893	0.230945	0.62671	0.649511	2.20554
		104	36.07	0.6055	0.435	2.0513	0.1301	0.8837	0.0656	0.1699	0.1895	0.6874				104	36.07	1.67868	1.20599	5.687	0.360688	2.44996	0.181869	0.471029	0.525367	1.90574
		105	34.7	0.5276	0.4236	2.5015	0.1249	0.7721	0.056	0.1456	0.1672	0.6296				105	34.7	1.52046	1.22075	7.20893	0.359942	2.22507	0.161383	0.419597	0.481844	1.81441
		106	34.89	0.764	0.4482	2.2474	0.0999	0.7961	0.057	0.1501	0.1426	0.5591				106	34.89	2.18974	1.28461	6.44139	0.286328	2.28174	0.163371	0.430209	0.408713	1.60246
		107	39.41	0.9077	0.417	2.5456	0.1588	0.8969	0.0603	0.1427	0.1694	0.6093				107	39.41	2.30322	1.05811	6.45927	0.402943	2.27582	0.153007	0.362091	0.42984	1.54605
		108	34.44	0.5201	0.3548	1.8049	0.1229	0.8092	0.0648	0.1673	0.1593	0.5978				108	34.44	1.51016	1.0302	5.24071	0.356852	2.34959	0.188153	0.485772	0.462544	1.73577
		109	36.51	0.6406	0.3423	2.4246	0.1246	0.8887	0.0567	0.1565	0.1715	0.6534				109	36.51	1.75459	0.937551	6.64092	0.341276	2.43413	0.1553	0.42865	0.469734	1.78965
		110	35.54	0.4989	0.4616	2.3218	0.108	0.8456	0.0593	0.1541	0.1602	0.5903				110	35.54	1.40377	1.29882	6.53292	0.303883	2.37929	0.166854	0.433596	0.45076	1.66095
		Mean	34.791	0.55797	0.36815	2.17252	0.12813	0.85856	0.05906	0.1638	0.16934	0.62568				Mean	34.791	1.58056	1.05091	6.22833	0.368377	2.48221	0.170554	0.475396	0.489801	1.80816
		SD	2.40775	0.187085	0.0884872	0.413597	0.0278387	0.0761162	0.00669032	0.0168785	0.0159508	0.0403194				SD	2.40775	0.444554	0.222576	1.09013	0.0794189	0.334905	0.0245836	0.0799418	0.0683817	0.196066
		SE	0.761397	0.0591615	0.0279821	0.130791	0.00880336	0.02407	0.00211567	0.00533744	0.00504408	0.0127501				SE	0.761397	0.14058	0.0703848	0.344731	0.0251145	0.105906	0.00777402	0.0252798	0.0216242	0.0620016
	G12 CJJ03-2	111	26.78	0.233	0.4473	1.1061	0.0901	0.7949	0.047	0.1519	0.1816	0.6669			G12 CJJ03-2	111	26.78	0.870052	1.67028	4.13032	0.336445	2.96826	0.175504	0.567214	0.678118	2.49029
		112	29.09	0.3215	0.1897	1.5459	0.1071	0.7777	0.0532	0.1423	0.1582	0.5885				112	29.09	1.10519	0.652114	5.3142	0.368168	2.67343	0.182881	0.489172	0.543829	2.02303
		113	29.82	0.3148	0.163	0.976	0.0849	0.7281	0.0478	0.1535	0.1492	0.5446				113	29.82	1.05567	0.546613	3.27297	0.284708	2.44165	0.160295	0.514755	0.500335	1.82629
		114	30.24	0.3356	0.1852	1.6993	0.087	0.7477	0.0466	0.1469	0.1799	0.6079				114	30.24	1.10979	0.612434	5.61938	0.287698	2.47255	0.154101	0.48578	0.594907	2.01025
		115	35.71	0.5396	0.3759	2.5515	0.0893	0.8238	0.0564	0.1769	0.1781	0.6295				115	35.71	1.51106	1.05265	7.14506	0.25007	2.30692	0.157939	0.495379	0.49874	1.76281
		116	31.54	0.3291	0.4069	1.4833	0.0883	0.8203	0.0549	0.1601	0.1589	0.6109				116	31.54	1.04344	1.29011	4.70292	0.279962	2.60082	0.174065	0.507609	0.503805	1.93691
		117	32.18	0.2339	0.5382	1.4094	0.1123	0.9281	0.0741	0.1689	0.1816	0.6709				117	32.18	0.726849	1.67247	4.37974	0.348975	2.88409	0.230267	0.52486	0.564326	2.08484
		118	36.61	0.6067	0.4764	2.9816	0.1034	0.7935	0.0531	0.1409	0.1601	0.6378				118	36.61	1.6572	1.30128	8.14422	0.282436	2.16744	0.145042	0.384868	0.437312	1.74215
		119	31.2	0.2797	0.4494	1.9032	0.0902	0.7718	0.051	0.1531	0.1648	0.6061				119	31.2	0.896474	1.44038	6.1	0.289103	2.47372	0.163462	0.490705	0.528205	1.94263
		120	36.55	0.6153	0.417	2.528	0.1191	0.8541	0.0504	0.1543	0.1723	0.5971				120	36.55	1.68345	1.1409	6.91655	0.325855	2.3368	0.137893	0.422161	0.471409	1.63365
		Mean	31.972	0.38092	0.3649	1.81843	0.09717	0.804	0.05345	0.15488	0.16847	0.61602				Mean	31.972	1.16592	1.13792	5.57254	0.305342	2.53257	0.168145	0.48825	0.532099	1.94528
		SD	3.33602	0.148126	0.135296	0.665517	0.0122039	0.0571748	0.00798029	0.0112564	0.0117131	0.0375105				SD	3.33602	0.335862	0.418933	1.51976	0.0372135	0.252936	0.0258186	0.0513944	0.068352	0.238673
		SE	1.05494	0.0468416	0.0427844	0.210455	0.00385922	0.0180803	0.00252359	0.00355958	0.00370399	0.0118619				SE	1.05494	0.106209	0.132478	0.480589	0.011768	0.0799853	0.00816454	0.0162523	0.0216148	0.0754751
	G13 CJJ03-3	121	25.39	0.1209	0.1704	0.4633	0.0705	0.9144	0.099	0.1651	0.1578	0.6086			G13 CJJ03-3	121	25.39	0.476172	0.67113	1.82473	0.277668	3.60142	0.389917	0.650256	0.621505	2.39701
		122	27.72	0.1746	0.1976	0.8253	0.123	1.0051	0.0521	0.1921	0.1734	0.6223				122	27.72	0.62987	0.712843	2.97727	0.443723	3.6259	0.187951	0.693001	0.625541	2.24495
		123	27.1	0.278	0.3279	1.1866	0.1089	0.7677	0.0472	0.1292	0.1331	0.491				123	27.1	1.02583	1.20996	4.3786	0.401845	2.83284	0.17417	0.476753	0.491144	1.81181
		124	30.92	0.269	0.2035	1.1681	0.0717	0.9402	0.094	0.1461	0.1633	0.6977				124	30.92	0.869987	0.65815	3.77781	0.231889	3.04075	0.30401	0.47251	0.528137	2.25647
		125	29.4	0.1534	0.2364	0.7042	0.0813	1.0449	0.0869	0.1745	0.1805	0.6127				125	29.4	0.521769	0.804082	2.39524	0.276531	3.55408	0.295578	0.593537	0.613946	2.08401
		126	33.96	0.3214	0.401	1.1777	0.0946	1.1501	0.0947	0.1962	0.1986	0.7229				126	33.96	0.946408	1.1808	3.4679	0.278563	3.38663	0.278857	0.577739	0.584806	2.12868
		127	33.84	0.5752	0.3597	1.9631	0.1123	0.792	0.053	0.1728	0.1479	0.5728				127	33.84	1.69976	1.06294	5.80112	0.331856	2.34043	0.156619	0.510638	0.437057	1.69267
		128	33.16	0.4896	0.3414	1.99	0.0954	0.8623	0.0576	0.1439	0.164	0.6188				128	33.16	1.47648	1.02955	6.00121	0.287696	2.60042	0.173703	0.433957	0.494572	1.8661
		129	34.39	0.5235	0.9434	2.0852	0.122	0.8542	0.0616	0.1518	0.1609	0.5873				129	34.39	1.52224	2.74324	6.06339	0.354754	2.48386	0.179122	0.441407	0.467869	1.70776
		130	32.08	0.3654	0.3667	1.7719	0.1004	0.7804	0.0519	0.1447	0.1636	0.5295				130	32.08	1.13903	1.14308	5.52338	0.312968	2.43267	0.161783	0.45106	0.509975	1.65056
		Mean	30.796	0.3271	0.3548	1.33354	0.09801	0.91113	0.0698	0.16164	0.16431	0.60636				Mean	30.796	1.03075	1.12158	4.22107	0.319749	2.9899	0.230171	0.530086	0.537455	1.984
		SD	3.22735	0.159779	0.222431	0.583988	0.0190765	0.125683	0.0210647	0.0221521	0.0176997	0.0691886				SD	3.22735	0.429451	0.609099	1.5694	0.0646434	0.518705	0.0805672	0.0925963	0.068851	0.270751
		SE	1.02058	0.0505267	0.0703388	0.184673	0.00603251	0.0397446	0.00666123	0.00700511	0.00559715	0.0218794				SE	1.02058	0.135804	0.192614	0.496289	0.020442	0.164029	0.0254776	0.0292815	0.0217726	0.0856189

## Sheet: Blood chemistry
	Blood chemistry profile
	Group	A. No	TC	TG	HDL	LDL	Glucose	AST	ALT	LDH	Creatine
			mg/dl	mg/dl	mg/dl	mg/dl	mg/dl	U/L	U/L	mg/dl	mg/dl
	G1 ND	1	70	46	36	9	44	98	50	578	0.2
		2	78	56	42	8.8	26	76	34	1906	0.4
		3	80	62	42	12	58	72	26	1344	0.4
		4	86	44	42	9.4	94	106	26	848	0.2
		5	90	48	46	9	118	70	18	790	0.2
		6	86	32	42	8.8	144	54	16	590	0.2
		7	84	32	42	6.8	150	72	62	792	0.4
		8	78	30	38	6.6	166	62	14	428	0.4
		9	80	22	42	5.8	158	34	12	368	0.2
		10	72	18	38	7	166	52	48	472	0.2
		Mean	80.4	39	41	8.32	112.4	69.6	30.6	811.6	0.28
		SD	6.31049	14.4607	2.86744	1.80911	53.4482	21.2457	17.3602	476.826	0.10328
		SE	1.99555	4.57287	0.906765	0.572092	16.9018	6.71847	5.48979	150.786	0.0326599
	G2 HFD	11	152	70	80	15.2	198	92	38	872	0.4
		12	172	54	62	22.8	162	360	150	3552	0.4
		13	156	42	58	13.2	164	84	24	1022	0.4
		14	136	96	72	14.4	136	88	42	610	0.2
		15	140	40	54	15.2	198	92	20	734	0.4
		16	136	84	56	17.6	182	80	18	584	0.2
		17	136	100	56	11.2	190	88	52	578	0.4
		18	132	104	54	14.8	272	100	44	516	0.4
		19	98	68	52	7.6	160	64	32	480	0.2
		20	128	100	50	12	160	112	108	846	0.2
		Mean	138.6	75.8	59.4	14.4	182.2	116	52.8	979.4	0.32
		SD	19.5061	24.5755	9.52424	4.02658	37.2433	86.6359	42.7624	920.609	0.10328
		SE	6.16838	7.77146	3.01183	1.27332	11.7774	27.3967	13.5227	291.122	0.0326599
	G3 OLS (40)	21	106	76	56	8.2	150	94	32	1076	0.2
		22	80	68	38	14.8	80	256	158	2370	0.4
		23	110	48	60	8.8	140	94	24	972	0.2
		24	92	38	58	9.4	118	118	86	1232	0.2
		25	106	36	60	9.6	186	94	52	938	0.4
		26	100	38	64	8.4	198	76	18	610	0.2
		27	90	30	54	7.8	150	108	44	802	0.2
		28	106	30	56	7.4	200	108	46	752	0.2
		29	102	32	60	8.2	134	124	24	744	0.2
		30	96	38	48	8.4	172	162	26	1016	0.4
		Mean	98.8	43.4	55.4	9.1	152.8	123.4	51	1051.2	0.26
		SD	9.29516	16.0568	7.48628	2.11082	37.6911	52.0858	42.5336	498.165	0.0966092
		SE	2.93939	5.07762	2.36737	0.667499	11.919	16.471	13.4503	157.534	0.0305505
	G5 CJB38-1	41	142	54	70	11.6	160	128	52	994	0.2
		42	128	46	68	9.8	172	88	44	582	0.4
		43	138	42	60	11.2	162	60	26	798	0.2
		44	124	34	60	11.6	184	118	86	860	0.4
		45	102	34	54	9.8	196	70	60	684	0.4
		46	122	26	62	9.2	194	60	38	524	0.2
		47	112	30	54	6	182	84	44	584	0.4
		48	114	36	56	8.8	188	94	56	590	0.4
		49	118	30	56	8.4	192	86	48	512	0.2
		50	112	30	66	10.4	208	90	48	596	0.2
		Mean	121.2	36.2	60.6	9.68	183.8	87.8	50.2	672.4	0.3
		SD	12.336	8.6641	5.81569	1.71322	15.3029	22.2401	15.7607	160.172	0.105409
		SE	3.901	2.73983	1.83908	0.541767	4.83919	7.03294	4.98397	50.6507	0.0333333
	G6 CJB38-2	51	128	64	74	13.6	120	98	42	1316	0.4
		52	128	56	64	9.2	110	100	64	1268	0.4
		53	110	42	58	10	92	106	32	660	0.2
		54	116	40	64	9	138	138	76	866	0.4
		55	130	44	72	11.2	244	94	46	776	0.2
		56	124	36	60	9	198	64	26	492	0.2
		57	132	38	68	12.4	176	72	44	620	0.2
		58	130	32	70	12.2	242	70	26	504	0.2
		59	122	30	62	9.4	212	64	28	578	0.4
		60	136	40	70	9.2	178	90	46	720	0.2
		Mean	125.6	42.2	66.2	10.52	171	89.6	43	780	0.28
		SD	7.8202	10.4754	5.3707	1.69758	54.2689	23.1286	16.5798	293.707	0.10328
		SE	2.47296	3.3126	1.69837	0.536822	17.1613	7.31391	5.24298	92.8784	0.0326599
	G7 CJB38-3	61	120	40	58	9.6	116	100	34	932	0.2
		62	120	56	68	11	134	116	50	1122	0.4
		63	116	40	54	9.6	174	88	30	552	0.4
		64	122	32	58	9.4	160	92	76	710	0.2
		65	124	28	66	10.4	134	108	52	910	0.4
		66	136	32	78	11.2	200	96	36	742	0.2
		67	68	22	32	8.8	198	90	36	552	0.2
		68	130	30	70	8.4	236	92	28	434	0.4
		69	124	42	58	8.8	248	66	44	442	0.4
		70	96	24	54	7	156	64	10	360	0.2
		Mean	115.6	34.6	59.6	9.42	175.6	91.2	39.6	675.6	0.3
		SD	19.7045	10.1127	12.4294	1.26298	44.2598	16.2809	17.5322	251.362	0.105409
		SE	6.2311	3.19792	3.93051	0.399388	13.9962	5.14846	5.54417	79.4877	0.0333333
	G8 CJB46-1	71	92	40	62	9.6	130	74	32	920	0.2
		72	124	44	52	24.4	88	94	20	958	0.2
		73	150	44	68	9.6	176	104	32	810	0.4
		74	74	48	34	8	176	116	34	556	0.2
		75	142	40	72	10.8	200	68	16	430	0.2
		76	134	30	72	9.4	182	76	28	502	0.2
		77	114	34	52	8.4	232	130	110	1080	0.4
		78	132	30	60	8.2	256	60	28	348	0.2
		79	128	36	58	10.4	190	60	24	378	0.2
		80	140	32	64	10.8	170	122	28	592	0.2
		Mean	123	37.8	59.4	10.96	180	90.4	35.2	657.4	0.24
		SD	23.6878	6.3561	11.4329	4.83119	47.2346	26.3447	26.8692	263.609	0.0843274
		SE	7.49074	2.00998	3.6154	1.52776	14.9369	8.33093	8.4968	83.3606	0.0266667
	G9 CJB46-2	81	106	52	58	10	124	140	64	1664	0.2
		82	138	46	72	11.6	154	82	28	1114	0.4
		83	120	34	54	8.8	140	60	34	504	0.2
		84	110	26	58	7.2	162	94	74	610	0.2
		85	110	26	52	7.2	212	62	16	466	0.2
		86	114	20	64	9.6	184	74	26	420	0.2
		87	114	34	62	7.4	216	58	36	466	0.4
		88	128	28	62	9.6	224	86	88	670	0.2
		89	130	28	64	9.4	192	122	50	582	0.2
		90	112	36	56	9	200	72	22	378	0.2
		Mean	118.2	33	60.2	8.98	180.8	85	43.8	687.4	0.24
		SD	10.4754	9.76388	5.84618	1.40301	34.2306	27.1989	24.2295	401.669	0.0843274
		SE	3.3126	3.08761	1.84872	0.443672	10.8247	8.60103	7.66203	127.019	0.0266667
	G10 CJB46-3	91	110	38	48	16.8	144	54	12	816	0.2
		92	134	34	66	9.4	164	82	30	956	0.2
		93	110	24	50	18.4	182	62	10	450	0.4
		94	148	30	72	11.6	212	82	24	452	0.2
		95	90	26	46	8	162	54	16	322	0.2
		96	94	28	46	8.4	134	150	40	634	0.2
		97	136	32	76	16.6	162	78	30	474	0.4
		98	106	38	70	10.6	228	88	54	764	0.4
		99	102	38	58	10	206	54	28	320	0.4
		100	118	36	64	8	186	66	38	430	0.2
		Mean	114.8	32.4	59.6	11.78	178	77	28.2	561.8	0.28
		SD	19.0485	5.23238	11.5007	3.97934	30.4047	28.7402	13.6121	219.017	0.10328
		SE	6.02366	1.65462	3.63685	1.25838	9.6148	9.08845	4.30452	69.2592	0.0326599
	G11 CJJ03-1	101	134	74	72	13.4	164	102	44	1136	0.2
		102	110	56	56	10.4	144	88	22	990	0.2
		103	122	30	68	11	184	70	22	632	0.2
		104	132	34	66	9.8	190	80	42	518	0.2
		105	134	30	70	11.4	208	88	28	604	0.2
		106	128	32	60	8.4	272	68	30	490	0.4
		107	120	24	60	9	208	72	34	530	0.2
		108	134	36	78	8.6	172	80	22	342	0.2
		109	124	34	64	8.8	188	84	26	462	0.2
		110	130	38	70	10.2	176	66	30	446	0.2
		Mean	126.8	38.8	66.4	10.1	190.6	79.8	30	615	0.22
		SD	7.8429	14.9429	6.58618	1.54991	34.5131	11.2131	7.94425	251.933	0.0632456
		SE	2.48014	4.72535	2.08273	0.490125	10.914	3.54589	2.51219	79.6683	0.02
	G12 CJJ03-2	111	114	48	60	9.2	106	88	32	1372	0.2
		112	140	44	68	10	122	90	68	936	0.4
		113	116	32	52	9.6	122	72	26	454	0.2
		114	120	36	56	9.4	166	64	16	394	0.2
		115	116	32	40	14.6	116	94	48	856	0.2
		116	110	24	50	9.6	168	52	16	408	0.2
		117	124	32	66	11.8	186	58	22	398	0.2
		118	118	36	50	8	262	46	22	246	0.4
		119	112	24	58	8.4	180	40	12	288	0.2
		120	108	34	48	9	164	120	64	708	0.2
		Mean	117.8	34.2	54.8	9.96	159.2	72.4	32.6	606	0.24
		SD	9.11409	7.56894	8.5479	1.9225	46.3436	25.2243	20.3317	357.429	0.0843274
		SE	2.88213	2.39351	2.70308	0.607947	14.6551	7.97663	6.42945	113.029	0.0266667
	G13 CJJ03-3	121	94	32	36	13.8	56	92	74	1822	0.2
		122	116	24	58	6.6	92	80	34	818	0.4
		123	104	26	54	7.2	188	100	52	642	0.2
		124	116	32	58	11.4	172	60	24	400	0.2
		125	96	40	42	13.2	90	54	16	336	0.2
		126	112	38	58	11.4	156	60	20	394	0.2
		127	130	30	70	9.6	172	58	12	312	0.4
		128	116	24	54	11.8	170	48	12	322	0.2
		129	110	32	54	8.8	212	50	14	250	0.2
		130	120	26	58	9.4	158	56	22	278	0.2
		Mean	111.4	30.4	54.2	10.32	146.6	65.8	28	557.4	0.24
		SD	10.9565	5.56177	9.35474	2.40777	49.9337	18.2196	20.2649	478.768	0.0843274
		SE	3.46474	1.75879	2.95823	0.761402	15.7904	5.76156	6.40833	151.4	0.0266667
