# Supplementary material for: Dose-dependent and strain-dependent anti-obesity effects of Lactobacillus sakei in a diet induced obese murine model
Source: PeerJ. 2019 Mar 21;7:e6651. doi: 10.7717/peerj.6651 (PMC6431538; doi:10.7717/peerj.6651)
Supplement: Supplemental Information 3 — Effect of the test materials/strains on body weight in HFD-induced obese mice. LFD, low-fat diet; HFD, high-fat diet; CJB38, CJB46 and CJLS03 denote the three Lactobacillus sakei strains; the three dose levels of each strain administered together with the HFD were 1 X 1010 CFU/mL (high-dose, H), 1 X 109 (medium-dose, M) and 1 X 108 CFU/mL (low-dose, L). Data expressed as mean ± SD (n=10). *, **: significantly different from ND group at p<0.05, p<0.01; #, ##:: significantly different from HFD group at p<0.05, p<0.01. [file peerj-07-6651-s003.docx]

**Supplementary information**

**Table S2**

**Dose dependent and strain-dependent anti-obesity effects of *Lactobacillus sakei* in a diet induced obese murine model**

Yosep Ji1*, Young Mee Chung2*, Soyoung Park1*, Dahye Jeong2, Bongjoon Kim2, Wilhelm H. Holzapfel1

1Department of Advanced Green Energy and Environment, Handong Global University, Pohang, Gyungbuk 37554, South Korea

2Beneficial microbes center, CJ Foods R&D, CJ CheilJedang Corporation, Suwon-si, South Korea

**Supplementary Table S2.** Effect of the test materials/strains on body weight in HFD-induced obese mice. LFD, low-fat diet; HFD, high-fat diet; CJB38, CJB46 and CJLS03 denote the three *Lactobacillus* *sakei* strains; the three dose levels of each strain administered together with the HFD were 1 X 1010 CFU/mL (high-dose, H), 1 X 109 (medium-dose, M) and 1 X 108 CFU/mL (low-dose, L). Data expressed as mean ± SD (n=10).

*, **: significantly different from ND group at *p*<0.05, *p*<0.01; #, ##:: significantly different from HFD group at *p*<0.05, *p*<0.01.

| Group | | Day 0 | Day 4 | Day 7 | Day 10 | Day 14 | Day 17 | Day 21 | Day 24 | Day 28 | Day 31 | Day 35 | Day 38 | Day 42 | Day 45 | Day 48 |
| --- | --- | --- | --- | --- | --- | --- | --- | --- | --- | --- | --- | --- | --- | --- | --- | --- |
| LFD | Mean | 24.48 | 24.16 | 24.16 | 24.58 | 24.52 | 24.91 | 24.73 | 24.70 | 24.80 | 25.13 | 25.09 | 24.98 | 25.55 | 25.27 | 25.92 |
| SD | 1.22 | 1.42 | 1.38 | 1.27 | 1.49 | 1.59 | 1.75 | 1.55 | 1.49 | 1.64 | 1.52 | 1.62 | 1.81 | 1.78 | 1.70 |
| HFD | Mean | 29.89** | 29.94** | 30.58** | 30.64** | 31.92** | 32.67** | 33.99** | 34.09** | 35.06** | 35.11** | 36.42** | 37.09** | 38.59** | 38.07** | 38.76** |
| SD | 1.40 | 1.74 | 2.04 | 1.93 | 1.57 | 1.85 | 1.28 | 1.23 | 1.27 | 1.14 | 1.03 | 1.25 | 1.56 | 1.74 | 1.56 |
| Orlistat | Mean | 29.88** | 27.33**## | 25.14## | 24.89## | 25.34## | 26.69*## | 27.52**## | 28.36**## | 28.70**## | 29.06**## | 28.33**## | 29.15**## | 30.95**## | 31.90**## | 32.47**## |
| SD | 1.37 | 1.22 | 1.10 | 1.15 | 1.11 | 1.21 | 1.38 | 1.19 | 1.44 | 1.53 | 1.71 | 1.89 | 2.04 | 1.84 | 1.70 |
| CJB38 L | Mean | 29.89** | 29.07** | 29.72** | 29.94** | 30.93** | 31.86** | 32.45** | 32.53** | 33.45** | 34.17** | 34.74** | 35.49** | 36.72** | 36.58** | 36.92** |
| SD | 1.39 | 1.42 | 1.67 | 1.72 | 1.70 | 1.70 | 1.90 | 1.88 | 1.98 | 1.81 | 1.76 | 1.78 | 1.97 | 2.00 | 1.80 |
| CJB38 M | Mean | 29.88** | 29.22** | 29.89** | 30.14** | 30.90** | 31.67** | 32.29**# | 32.33**# | 33.17**# | 33.76** | 34.10**# | 34.52**# | 36.30** | 36.09** | 36.14**# |
| SD | 1.39 | 1.22 | 1.23 | 1.34 | 1.60 | 1.92 | 2.08 | 2.10 | 2.17 | 2.41 | 2.76 | 3.12 | 3.55 | 3.36 | 3.44 |
| CJB38 H | Mean | 29.87** | 28.89** | 29.51** | 30.20** | 30.87** | 31.61** | 32.28**# | 32.33**# | 33.14**# | 33.84** | 34.81** | 35.43** | 37.05** | 36.85** | 36.97** |
| SD | 1.39 | 1.56 | 1.47 | 1.50 | 1.59 | 1.87 | 2.20 | 2.20 | 2.46 | 2.58 | 2.88 | 3.05 | 3.29 | 3.71 | 3.32 |
| CJB46 L | Mean | 29.89** | 29.65** | 30.21** | 30.29** | 31.01** | 31.66** | 32.16**# | 32.33**# | 33.26** | 33.61** | 33.81**# | 34.15**## | 35.54**# | 35.24**# | 35.34**## |
| SD | 1.43 | 1.68 | 1.78 | 1.80 | 1.84 | 1.81 | 2.09 | 2.23 | 2.62 | 2.69 | 2.63 | 2.69 | 2.85 | 3.01 | 3.10 |
| CJB46 M | Mean | 29.88** | 29.62** | 29.97** | 30.58** | 31.20** | 32.05** | 32.36**# | 32.43**# | 33.10**# | 33.43** | 34.09**# | 34.40**# | 35.38**## | 35.15**# | 35.46**## |
| SD | 1.39 | 1.41 | 1.63 | 1.62 | 1.53 | 1.59 | 1.79 | 1.49 | 1.77 | 1.96 | 1.95 | 2.01 | 1.93 | 2.06 | 2.12 |
| CJB46 H | Mean | 29.88** | 29.45** | 29.96** | 30.47** | 31.33** | 32.73** | 33.08** | 32.80** | 33.50** | 34.10** | 34.48**# | 34.58**# | 35.69**# | 35.92**# | 36.04**# |
| SD | 1.40 | 1.26 | 1.24 | 1.10 | 0.69 | 0.64 | 1.09 | 1.64 | 2.08 | 2.16 | 2.46 | 2.95 | 3.18 | 2.88 | 3.63 |
| CJLS03 L | Mean | 29.89** | 28.70** | 29.00**# | 29.73** | 31.16** | 32.18** | 32.76** | 32.70** | 33.19**# | 33.98** | 34.56** | 35.29** | 36.47** | 36.37** | 36.46**# |
| SD | 1.35 | 1.84 | 2.14 | 2.05 | 1.84 | 1.67 | 1.60 | 1.61 | 1.54 | 1.72 | 1.69 | 1.70 | 1.92 | 2.05 | 2.01 |
| CJLS03 M | Mean | 29.88** | 29.03** | 29.15**# | 29.60** | 30.01**## | 30.82**# | 31.27**## | 31.28**## | 31.79**## | 32.43**# | 33.15**## | 33.36**## | 34.42**## | 34.21**## | 34.43**## |
| SD | 1.45 | 1.64 | 1.73 | 1.86 | 2.26 | 2.37 | 2.47 | 2.28 | 2.49 | 2.46 | 2.76 | 2.92 | 3.15 | 3.17 | 3.05 |
| CJLS03 H | Mean | 29.87** | 28.69** | 28.36**## | 28.62**## | 29.08**## | 29.85**## | 30.04**## | 30.33**## | 30.88**## | 31.33**## | 31.48**## | 31.44**## | 32.54**## | 32.70**## | 32.75**## |
| SD | 1.39 | 1.59 | 1.63 | 1.27 | 1.33 | 1.60 | 1.90 | 1.97 | 2.39 | 2.45 | 2.86 | 2.97 | 2.91 | 3.07 | 2.81 |
